# Supplementary material for: Donor moieties with D–π–a framing modulated electronic and nonlinear optical properties for non-fullerene-based chromophores
Source: Royal Society of Chemistry journal article supplement (doi:10.1039/d1ra07183a), 2022-01-01
Supplement: d1ra07183a1.pdf [file d1ra07183a1.pdf]

## Donor Moieties with D- $\pi$ -A Framing Modulated Electronic and Nonlinear Optical Properties for Non-Fullerene Based Chromophores

Muhammad Nadeem Arshad<sup>1,2</sup>, Muhammad Khalid<sup>\*3</sup>, Ghulam shabbir<sup>3</sup>, Mohammad Asad<sup>1,2</sup>, Abdullah M. Asiri<sup>1,2</sup>, Maha M. Alotaibi<sup>1</sup>, Ataulpa A. C. Braga,<sup>4</sup> Anish Khan<sup>1,2</sup>

<sup>1</sup>Chemistry Department, Faculty of Science, King Abdulaziz University, Jeddah 21589, P.O. Box 80203, Saudi Arabia.

<sup>2</sup>Center of Excellence for Advanced Material Research (CEAMR), King Abdulaziz University, Jeddah 21589, P.O. Box 80203, Saudi Arabia.

<sup>3</sup>Department of Chemistry, Khwaja Fareed University of Engineering & Information Technology, Rahim Yar Khan, 64200, Pakistan

<sup>4</sup>Departamento de Química Fundamental, Instituto de Química, Universidade de São Paulo, Av. Prof. Lineu Prestes, 748, São Paulo, 05508-000, Brazil.

Corresponding author<sup>\*3</sup>E-mail address: [khalid@iq.usp.br](mailto:khalid@iq.usp.br); [muhammad.khalid@kfueit.edu.pk](mailto:muhammad.khalid@kfueit.edu.pk); [khalidhej@hotmail.com](mailto:khalidhej@hotmail.com) (Muhammad Khalid)

**Table S1:** Cartesian coordinates of FH

| Atom | X-axis   | Y-axis   | Z-axis    |
|------|----------|----------|-----------|
| C    | 2.973929 | -1.77683 | 0.000086  |
| C    | 3.419148 | -0.4362  | 0.00001   |
| C    | 2.519953 | 0.629309 | -0.000002 |
| C    | 1.17248  | 0.32973  | 0.000063  |
| C    | 0.726582 | -1.00343 | 0.000153  |
| C    | 1.626664 | -2.06901 | 0.000167  |
| H    | 2.873295 | 1.658646 | -0.000044 |
| H    | 1.278001 | -3.10003 | 0.000252  |
| C    | 0.000002 | 1.288082 | 0.000044  |
| C    | -1.17248 | 0.329729 | 0.000118  |
| C    | -2.51995 | 0.629305 | 0.000114  |
| C    | -3.41914 | -0.43621 | 0.0002    |

|   |          |          |           |
|---|----------|----------|-----------|
| C | -2.97392 | -1.77683 | 0.000295  |
| C | -1.62665 | -2.06902 | 0.00029   |
| C | -0.72658 | -1.00343 | 0.000195  |
| H | -2.8733  | 1.658641 | 0.000062  |
| H | -1.27799 | -3.10003 | 0.000369  |
| C | 4.860008 | -0.4769  | -0.000048 |
| C | 4.142395 | -2.74917 | 0.000049  |
| C | 5.302874 | -1.78834 | -0.000034 |
| C | -4.86    | -0.47691 | 0.000216  |
| C | -4.14239 | -2.74918 | 0.000388  |
| C | -5.30287 | -1.78835 | 0.000331  |
| C | 7.315871 | -0.62787 | -0.00014  |
| C | 6.683627 | -1.87734 | -0.00011  |
| H | 7.260948 | -2.7981  | -0.00013  |
| S | 6.12313  | 0.679226 | -0.00013  |
| C | -6.68362 | -1.87735 | 0.000351  |
| H | -7.26095 | -2.79811 | 0.000389  |
| C | -7.31587 | -0.62788 | 0.000241  |
| S | -6.12312 | 0.679212 | 0.000123  |
| C | -8.72611 | -0.5535  | 0.000144  |
| H | -9.14527 | -1.5561  | 0.000239  |
| C | 8.726113 | -0.55351 | -0.00015  |
| H | 9.145269 | -1.5561  | -0.00029  |
| C | 10.59074 | 2.62904  | -0.000082 |
| C | 11.64483 | 1.710581 | -0.00021  |
| C | 12.95439 | 2.182676 | -0.0004   |
| C | 13.16246 | 3.556834 | -0.00047  |
| C | 12.10133 | 4.45789  | -0.00033  |

|   |          |          |           |
|---|----------|----------|-----------|
| C | 10.79329 | 3.994143 | -0.00013  |
| C | 9.635175 | 0.470649 | -0.000021 |
| H | 13.80787 | 1.517026 | -0.00049  |
| H | 14.18063 | 3.932786 | -0.00062  |
| H | 12.30261 | 5.524381 | -0.00038  |
| H | 9.940504 | 4.666109 | -0.000008 |
| C | -11.6448 | 1.71059  | 0.00002   |
| C | -10.5907 | 2.629047 | 0.000184  |
| C | -10.7933 | 3.994148 | 0.000344  |
| C | -12.1013 | 4.457898 | 0.000342  |
| C | -13.1625 | 3.556846 | 0.000186  |
| C | -12.9544 | 2.182687 | 0.000024  |
| C | -9.63517 | 0.470655 | -0.000054 |
| H | -9.94049 | 4.666114 | 0.000462  |
| H | -12.3026 | 5.524388 | 0.00046   |
| H | -14.1806 | 3.9328   | 0.000193  |
| H | -13.8079 | 1.517038 | -0.000069 |
| C | 9.305874 | 1.906268 | 0.000088  |
| O | 8.202826 | 2.411148 | 0.000318  |
| C | -9.30587 | 1.906266 | 0.00012   |
| O | -8.20283 | 2.411158 | 0.000237  |
| C | -11.0865 | 0.341765 | -0.00022  |
| C | -11.8398 | -0.80677 | -0.00063  |
| C | 11.08647 | 0.341756 | -0.0001   |
| C | 11.83975 | -0.80678 | -0.000016 |
| C | 11.2861  | -2.11736 | 0.000191  |
| N | 10.85357 | -3.18934 | 0.000353  |
| C | 13.26213 | -0.80571 | -0.000097 |

|   |           |          |          |
|---|-----------|----------|----------|
| N | 14.41696  | -0.84148 | -0.00015 |
| C | -11.2861  | -2.11736 | -0.00113 |
| N | -10.8537  | -3.18937 | -0.00156 |
| C | -13.2621  | -0.80568 | -0.00062 |
| N | -14.417   | -0.84149 | -0.00061 |
| C | 0.000026  | 2.159834 | 1.255513 |
| H | -0.88584  | 2.804431 | 1.278604 |
| H | 0.000045  | 1.543733 | 2.160495 |
| H | 0.88589   | 2.804434 | 1.278568 |
| C | -0.000025 | 2.159761 | -1.25546 |
| H | 0.885833  | 2.804366 | -1.27859 |
| H | -4.1E-05  | 1.543619 | -2.16042 |
| H | -0.88589  | 2.804361 | -1.27856 |
| C | -4.14076  | -3.61888 | 1.256643 |
| H | -5.0278   | -4.26219 | 1.27805  |
| H | -3.25525  | -4.26392 | 1.280312 |
| H | -4.14142  | -3.00173 | 2.160736 |
| C | -4.1408   | -3.61904 | -1.25576 |
| H | -4.14156  | -3.00201 | -2.15993 |
| H | -3.25527  | -4.26405 | -1.2794  |
| H | -5.02782  | -4.2624  | -1.27702 |
| C | 4.140848  | -3.61895 | 1.256242 |
| H | 3.255293  | -4.26393 | 1.279971 |
| H | 5.027839  | -4.26234 | 1.277502 |
| H | 4.14167   | -3.00187 | 2.160378 |
| C | 4.140728  | -3.61895 | -1.25616 |
| H | 3.255162  | -4.26391 | -1.27981 |
| H | 4.141483  | -3.00185 | -2.16029 |

---

|   |          |          |          |
|---|----------|----------|----------|
| H | 5.027713 | -4.26234 | -1.27749 |
|---|----------|----------|----------|

---

**Table S2:** Cartesian coordinates of **FHD1**

---

| <b>Atom</b> | <b>X-axis</b> | <b>Y-axis</b> | <b>Z-axis</b> |
|-------------|---------------|---------------|---------------|
| C           | 2.655593      | -1.70776      | 0.073629      |
| C           | 3.115453      | -0.37432      | 0.008519      |
| C           | 2.22596       | 0.698762      | -0.0555       |
| C           | 0.876895      | 0.412973      | -0.05365      |
| C           | 0.414834      | -0.91464      | 0.008875      |
| C           | 1.304753      | -1.98664      | 0.073167      |
| H           | 2.590062      | 1.723336      | -0.10463      |
| H           | 0.944792      | -3.01266      | 0.122223      |
| C           | -0.28634      | 1.380832      | -0.11243      |
| C           | -1.46875      | 0.435359      | -0.07689      |
| C           | -2.81523      | 0.751649      | -0.10531      |
| C           | -3.72738      | -0.29825      | -0.06307      |
| C           | -3.29673      | -1.6429       | 0.007538      |
| C           | -1.95476      | -1.95064      | 0.035974      |
| C           | -1.03809      | -0.89763      | -0.00695      |
| H           | -3.15392      | 1.784625      | -0.15975      |
| H           | -1.61939      | -2.98512      | 0.090301      |
| C           | 4.554124      | -0.4288       | 0.026044      |
| C           | 3.813738      | -2.6906       | 0.138852      |
| C           | 4.985269      | -1.74355      | 0.102454      |
| C           | -5.1708       | -0.33299      | -0.07889      |
| C           | -4.48224      | -2.59509      | 0.042198      |
| C           | -5.6313       | -1.62184      | -0.0239       |
| C           | 7.009976      | -0.60197      | 0.059367      |

---

|   |          |          |          |
|---|----------|----------|----------|
| C | 6.363519 | -1.84443 | 0.122639 |
| H | 6.932122 | -2.769   | 0.178787 |
| S | 5.827636 | 0.713952 | -0.02545 |
| C | -7.03419 | -1.71466 | -0.03304 |
| H | -7.59665 | -2.64049 | 0.03709  |
| S | -6.45602 | 0.810836 | -0.15564 |
| C | 8.418104 | -0.54067 | 0.065609 |
| H | 8.82818  | -1.54502 | 0.128545 |
| C | 10.31327 | 2.621205 | -0.10032 |
| C | 11.35907 | 1.695564 | -0.04342 |
| C | 12.67227 | 2.156716 | -0.0568  |
| C | 12.89177 | 3.527726 | -0.12749 |
| C | 11.83854 | 4.435781 | -0.18467 |
| C | 10.52667 | 3.982554 | -0.171   |
| C | 9.338702 | 0.474808 | 0.010264 |
| H | 13.52007 | 1.485175 | -0.01386 |
| H | 13.91313 | 3.894914 | -0.13792 |
| H | 12.04855 | 5.499241 | -0.23936 |
| H | 9.679069 | 4.659756 | -0.21362 |
| C | 9.021979 | 1.909419 | -0.0715  |
| O | 7.923955 | 2.424559 | -0.10837 |
| C | 10.78685 | 0.333057 | 0.02325  |
| C | 11.53157 | -0.82078 | 0.080176 |
| C | 10.96831 | -2.12559 | 0.140076 |
| N | 10.52919 | -3.19386 | 0.189067 |
| C | 12.9537  | -0.83058 | 0.083566 |
| N | 14.10834 | -0.87561 | 0.088068 |
| C | -0.2883  | 2.311921 | 1.099876 |

|   |          |          |          |
|---|----------|----------|----------|
| H | -1.16856 | 2.964642 | 1.085036 |
| H | -0.30231 | 1.738757 | 2.032581 |
| H | 0.603457 | 2.949125 | 1.101191 |
| C | -0.26543 | 2.191724 | -1.40755 |
| H | 0.626106 | 2.827556 | -1.45222 |
| H | -0.26186 | 1.532795 | -2.28187 |
| H | -1.14608 | 2.84088  | -1.47076 |
| C | -4.50868 | -3.39959 | 1.340654 |
| H | -5.40605 | -4.02787 | 1.384387 |
| H | -3.63296 | -4.05506 | 1.409364 |
| H | -4.51127 | -2.7358  | 2.211089 |
| C | -4.47877 | -3.5287  | -1.16743 |
| H | -4.45692 | -2.95731 | -2.10092 |
| H | -3.60483 | -4.18993 | -1.14739 |
| H | -5.3775  | -4.15675 | -1.16936 |
| C | 3.788152 | -3.49508 | 1.437381 |
| H | 2.895508 | -4.12902 | 1.482503 |
| H | 4.668325 | -4.14494 | 1.502562 |
| H | 3.784154 | -2.83264 | 2.308839 |
| C | 3.817478 | -3.62394 | -1.07114 |
| H | 2.92486  | -4.25964 | -1.07296 |
| H | 3.835256 | -3.05358 | -2.00531 |
| H | 4.697538 | -4.27699 | -1.04942 |
| H | -11.3639 | 3.398389 | 0.302983 |
| C | -9.96439 | -1.11127 | -0.67886 |
| C | -9.06828 | -0.18025 | -0.13274 |
| C | -9.57092 | 1.025982 | 0.373222 |
| C | -10.9257 | 1.276659 | 0.326783 |

|   |          |          |          |
|---|----------|----------|----------|
| C | -11.8103 | 0.334476 | -0.21515 |
| C | -11.3252 | -0.86639 | -0.71781 |
| H | -9.57179 | -2.03152 | -1.10145 |
| H | -8.89393 | 1.749906 | 0.821572 |
| H | -12.0005 | -1.60059 | -1.14895 |
| C | -11.6884 | 2.479034 | 0.807858 |
| H | -11.5479 | 2.647394 | 1.883754 |
| C | -13.1118 | 2.127692 | 0.475843 |
| C | -14.2695 | 2.853964 | 0.682891 |
| C | -15.486  | 2.311124 | 0.282763 |
| C | -15.5402 | 1.05612  | -0.3166  |
| C | -14.3818 | 0.322132 | -0.52624 |
| C | -13.1662 | 0.862988 | -0.12727 |
| H | -14.2334 | 3.834879 | 1.149936 |
| H | -16.4031 | 2.870986 | 0.438715 |
| H | -16.4992 | 0.64931  | -0.62258 |
| H | -14.4258 | -0.65801 | -0.99378 |
| C | -7.643   | -0.48346 | -0.09734 |

---

**Table S3:**Cartesian coordinates ofFHD2

| <b>Atom</b> | <b>X-axis</b> | <b>Y-axis</b> | <b>Z-axis</b> |
|-------------|---------------|---------------|---------------|
| C           | -4.01728      | -1.70534      | 0.0599        |
| C           | -4.48162      | -0.37471      | -0.02767      |
| C           | -3.59556      | 0.700284      | -0.10773      |
| C           | -2.24559      | 0.419364      | -0.0968       |
| C           | -1.77916      | -0.90542      | -0.00998      |
| C           | -2.66555      | -1.97944      | 0.067884      |



|   |          |          |          |
|---|----------|----------|----------|
| H | -3.9632  | 1.722628 | -0.17418 |
| H | -2.30198 | -3.00311 | 0.135979 |
| C | -1.08517 | 1.390117 | -0.16492 |
| C | 0.100309 | 0.449911 | -0.10172 |
| C | 1.446022 | 0.770729 | -0.11802 |
| C | 2.361445 | -0.27456 | -0.0427  |
| C | 1.934326 | -1.61962 | 0.04485  |
| C | 0.593357 | -1.93191 | 0.058542 |
| C | -0.32644 | -0.88322 | -0.01405 |
| H | 1.781907 | 1.803893 | -0.18506 |
| H | 0.260621 | -2.96646 | 0.126368 |
| C | -5.91999 | -0.43362 | -0.00714 |
| C | -5.17207 | -2.6909  | 0.140501 |
| C | -6.34674 | -1.74842 | 0.091768 |
| C | 3.804903 | -0.30355 | -0.02665 |
| C | 3.122417 | -2.56605 | 0.118513 |
| C | 4.26876  | -1.58859 | 0.070326 |
| C | -8.37525 | -0.61384 | 0.041581 |
| C | -7.72443 | -1.85321 | 0.120032 |
| H | -8.28978 | -2.77855 | 0.193687 |
| S | -7.1974  | 0.704278 | -0.06976 |
| C | 5.671828 | -1.67695 | 0.08664  |
| H | 6.237135 | -2.60304 | 0.124441 |
| S | 5.088292 | 0.844427 | -0.08835 |
| C | -9.78334 | -0.55707 | 0.05695  |
| H | -10.1894 | -1.56181 | 0.136291 |
| C | -11.6899 | 2.596834 | -0.1271  |
| C | -12.7323 | 1.668882 | -0.05065 |

|   |          |          |          |
|---|----------|----------|----------|
| C | -14.0468 | 2.126375 | -0.05525 |
| C | -14.2708 | 3.496131 | -0.13668 |
| C | -13.2208 | 4.40648  | -0.21309 |
| C | -11.9076 | 3.956865 | -0.2086  |
| C | -10.7079 | 0.454632 | -0.00396 |
| H | -14.8923 | 1.45298  | 0.002706 |
| H | -15.2933 | 3.860403 | -0.14014 |
| H | -13.4343 | 5.468812 | -0.27554 |
| H | -11.0623 | 4.635764 | -0.26632 |
| C | -10.3963 | 1.889049 | -0.10453 |
| O | -9.30023 | 2.406919 | -0.15861 |
| C | -12.1553 | 0.308716 | 0.023817 |
| C | -12.8961 | -0.8467  | 0.098541 |
| C | -12.3286 | -2.14932 | 0.164984 |
| N | -11.8859 | -3.21587 | 0.219623 |
| C | -14.318  | -0.86029 | 0.11579  |
| N | -15.4725 | -0.90845 | 0.131935 |
| C | -1.09873 | 2.175622 | -1.47574 |
| H | -0.21986 | 2.826624 | -1.54433 |
| H | -1.09287 | 1.49977  | -2.33703 |
| H | -1.99237 | 2.806831 | -1.53974 |
| C | -1.09612 | 2.344808 | 1.02891  |
| H | -1.99029 | 2.978376 | 1.011374 |
| H | -1.08671 | 1.790106 | 1.972766 |
| H | -0.21849 | 3.000887 | 1.00801  |
| C | 3.151608 | -3.51217 | -1.08117 |
| H | 4.053287 | -4.13546 | -1.0565  |
| H | 2.280494 | -4.17743 | -1.07377 |

|   |          |          |          |
|---|----------|----------|----------|
| H | 3.148069 | -2.95052 | -2.02077 |
| C | 3.122051 | -3.35742 | 1.425186 |
| H | 3.0996   | -2.68517 | 2.288836 |
| H | 2.249312 | -4.01817 | 1.479519 |
| H | 4.022069 | -3.97938 | 1.496445 |
| C | -5.17378 | -3.64141 | -1.0562  |
| H | -4.27876 | -4.27372 | -1.05    |
| H | -6.05144 | -4.29728 | -1.02432 |
| H | -5.19461 | -3.08446 | -1.99837 |
| C | -5.14287 | -3.47697 | 1.450167 |
| H | -4.2486  | -4.10798 | 1.503184 |
| H | -5.13958 | -2.80236 | 2.312233 |
| H | -6.02126 | -4.12814 | 1.525559 |
| C | 8.607144 | -1.00046 | 0.635412 |
| C | 7.701571 | -0.14084 | 0.002937 |
| C | 8.218887 | 0.997651 | -0.62319 |
| C | 9.574152 | 1.2643   | -0.62528 |
| C | 10.46875 | 0.399655 | 0.008271 |
| C | 9.962039 | -0.73861 | 0.639999 |
| H | 8.232239 | -1.87132 | 1.165473 |
| H | 7.548419 | 1.671503 | -1.15024 |
| H | 10.64642 | -1.41071 | 1.14932  |
| C | 6.277862 | -0.44535 | 0.002852 |
| N | 11.85156 | 0.663712 | 0.012533 |
| H | 9.956119 | 2.146508 | -1.13029 |
| C | 12.32895 | 1.982839 | 0.181501 |
| C | 11.71783 | 2.846234 | 1.091732 |
| C | 13.42382 | 2.437474 | -0.55428 |

|   |          |          |          |
|---|----------|----------|----------|
| C | 12.18933 | 4.138615 | 1.252175 |
| H | 10.87046 | 2.493631 | 1.672038 |
| C | 13.89987 | 3.725657 | -0.37303 |
| H | 13.89882 | 1.770904 | -1.26785 |
| C | 13.28509 | 4.585685 | 0.526446 |
| H | 11.70303 | 4.798213 | 1.964564 |
| H | 14.75372 | 4.063928 | -0.95232 |
| H | 13.65716 | 5.596065 | 0.661314 |
| C | 12.76716 | -0.40034 | -0.16695 |
| C | 13.90467 | -0.49935 | 0.633449 |
| C | 12.54074 | -1.36157 | -1.15159 |
| C | 14.80212 | -1.53726 | 0.441622 |
| H | 14.07909 | 0.246412 | 1.40349  |
| C | 13.43428 | -2.40575 | -1.32515 |
| H | 11.65679 | -1.27955 | -1.77745 |
| C | 14.57147 | -2.49744 | -0.53428 |
| H | 15.68464 | -1.60245 | 1.07079  |
| H | 13.24675 | -3.14706 | -2.09606 |
| H | 15.27401 | -3.31203 | -0.67736 |

**Table S4:** Cartesian coordinates of **FHD3**

| <b>Atom</b> | <b>X-axis</b> | <b>Y-axis</b> | <b>Z-axis</b> |
|-------------|---------------|---------------|---------------|
| C           | 4.75087       | -1.67536      | -0.15455      |
| C           | 5.254124      | -0.37454      | 0.06487       |
| C           | 4.401054      | 0.713207      | 0.253748      |
| C           | 3.043575      | 0.47587       | 0.215087      |
| C           | 2.537469      | -0.81875      | -0.00365      |

|   |          |          |          |
|---|----------|----------|----------|
| C | 3.391378 | -1.90628 | -0.18853 |
| H | 4.799716 | 1.712105 | 0.420931 |
| H | 2.996668 | -2.90619 | -0.35946 |
| C | 1.914009 | 1.470867 | 0.377637 |
| C | 0.700695 | 0.580631 | 0.210694 |
| C | -0.6338  | 0.943043 | 0.243595 |
| C | -1.58051 | -0.05916 | 0.057026 |
| C | -1.19654 | -1.40376 | -0.15281 |
| C | 0.134006 | -1.75753 | -0.18335 |
| C | 1.085787 | -0.75121 | -0.00311 |
| H | -0.93833 | 1.975226 | 0.406636 |
| H | 0.435497 | -2.79075 | -0.34838 |
| C | 6.68982  | -0.47206 | 0.031905 |
| C | 5.876708 | -2.68061 | -0.33774 |
| C | 7.078526 | -1.78218 | -0.1988  |
| C | -3.02325 | -0.03573 | 0.015961 |
| C | -2.41469 | -2.29737 | -0.3307  |
| C | -3.52849 | -1.28894 | -0.20717 |
| C | 9.138548 | -0.71339 | -0.05608 |
| C | 8.45249  | -1.92109 | -0.24835 |
| H | 8.991198 | -2.84966 | -0.4185  |
| S | 7.998667 | 0.619116 | 0.193692 |
| C | -4.93297 | -1.32299 | -0.26341 |
| H | -5.52933 | -2.21947 | -0.40218 |
| S | -4.26627 | 1.149416 | 0.150899 |
| C | 10.54747 | -0.6934  | -0.08945 |
| H | 10.92226 | -1.69649 | -0.27111 |
| C | 12.53746 | 2.379782 | 0.361872 |

|   |          |          |          |
|---|----------|----------|----------|
| C | 13.55586 | 1.442274 | 0.170228 |
| C | 14.88016 | 1.871041 | 0.19188  |
| C | 15.13543 | 3.221443 | 0.403424 |
| C | 14.10814 | 4.14119  | 0.592087 |
| C | 12.7858  | 3.72022  | 0.572701 |
| C | 11.5008  | 0.283524 | 0.049151 |
| H | 15.70916 | 1.189951 | 0.049743 |
| H | 16.16569 | 3.562597 | 0.420414 |
| H | 14.34679 | 5.187487 | 0.754386 |
| H | 11.95633 | 4.405917 | 0.716031 |
| C | 11.22726 | 1.707535 | 0.298199 |
| O | 10.14636 | 2.243403 | 0.428419 |
| C | 12.94386 | 0.109422 | -0.02857 |
| C | 13.65431 | -1.04693 | -0.24497 |
| C | 13.05388 | -2.32205 | -0.43516 |
| N | 12.58341 | -3.36621 | -0.59196 |
| C | 15.07475 | -1.08768 | -0.30201 |
| N | 16.22696 | -1.15681 | -0.35467 |
| C | 1.93998  | 2.111292 | 1.765524 |
| H | 1.081069 | 2.778624 | 1.89867  |
| H | 1.905211 | 1.347361 | 2.548938 |
| H | 2.852217 | 2.703067 | 1.902102 |
| C | 1.966786 | 2.546981 | -0.70655 |
| H | 2.882736 | 3.142142 | -0.6176  |
| H | 1.944816 | 2.097807 | -1.70478 |
| H | 1.113267 | 3.228706 | -0.61844 |
| C | -2.49695 | -3.35134 | 0.772563 |
| H | -3.42175 | -3.93256 | 0.677951 |

|   |          |          |          |
|---|----------|----------|----------|
| H | -1.65224 | -4.04715 | 0.711022 |
| H | -2.48588 | -2.88262 | 1.761743 |
| C | -2.41949 | -2.96133 | -1.70683 |
| H | -2.35792 | -2.21145 | -2.50192 |
| H | -1.57003 | -3.64578 | -1.8118  |
| H | -3.33956 | -3.5401  | -1.84993 |
| C | 5.850721 | -3.7492  | 0.754542 |
| H | 4.936142 | -4.34907 | 0.687061 |
| H | 6.707441 | -4.42511 | 0.651154 |
| H | 5.890199 | -3.29375 | 1.749211 |
| C | 5.825119 | -3.3272  | -1.72141 |
| H | 4.913511 | -3.92411 | -1.83662 |
| H | 5.840762 | -2.56757 | -2.50938 |
| H | 6.684792 | -3.99147 | -1.86623 |
| C | -7.82315 | -0.49732 | -0.82859 |
| C | -6.90788 | 0.278976 | -0.10715 |
| C | -7.40176 | 1.395753 | 0.573759 |
| C | -8.74329 | 1.725506 | 0.536814 |
| C | -9.64473 | 0.949212 | -0.19246 |
| C | -9.16316 | -0.1725  | -0.87147 |
| H | -7.46522 | -1.34889 | -1.39995 |
| H | -6.72607 | 2.002687 | 1.170822 |
| H | -9.85376 | -0.77813 | -1.45078 |
| C | -5.49761 | -0.0816  | -0.08517 |
| N | -11.0104 | 1.289812 | -0.2547  |
| H | -9.10747 | 2.591399 | 1.081492 |
| C | -11.4059 | 2.641664 | -0.36351 |
| C | -10.7098 | 3.516942 | -1.19916 |

|   |          |          |          |
|---|----------|----------|----------|
| C | -12.5048 | 3.116245 | 0.352824 |
| C | -11.1033 | 4.840122 | -1.30477 |
| H | -9.85936 | 3.147784 | -1.76461 |
| C | -12.9023 | 4.437734 | 0.225666 |
| H | -13.044  | 2.44067  | 1.010244 |
| C | -12.2033 | 5.308468 | -0.59814 |
| H | -10.5524 | 5.508992 | -1.95909 |
| H | -13.7602 | 4.792161 | 0.789016 |
| H | -12.5129 | 6.34445  | -0.68963 |
| C | -11.9956 | 0.281072 | -0.1522  |
| C | -13.1109 | 0.311711 | -1.02691 |
| C | -11.8836 | -0.73236 | 0.768134 |
| C | -14.0714 | -0.65412 | -0.95608 |
| H | -13.1825 | 1.115685 | -1.75331 |
| C | -12.8562 | -1.75218 | 0.84973  |
| H | -11.0318 | -0.75694 | 1.443621 |
| C | -13.9786 | -1.71338 | -0.02276 |
| H | -14.9224 | -0.62865 | -1.63215 |
| C | -14.9567 | -2.72722 | 0.070131 |
| C | -12.7623 | -2.80428 | 1.790188 |
| H | -11.9056 | -2.82941 | 2.458922 |
| C | -14.8375 | -3.73371 | 0.989867 |
| H | -15.596  | -4.50755 | 1.053921 |
| C | -13.729  | -3.76985 | 1.859488 |
| H | -13.6448 | -4.57116 | 2.587198 |
| H | -15.8096 | -2.69114 | -0.60323 |

---

**Table S5:**Cartesian coordinates of **FHD4**



| <b>Atom</b> | <b>X-axis</b> | <b>Y-axis</b> | <b>Z-axis</b> |
|-------------|---------------|---------------|---------------|
| C           | -3.30215      | 1.577006      | -0.15461      |
| C           | -3.83129      | 0.271801      | -0.05518      |
| C           | -3.00144      | -0.84891      | -0.02581      |
| C           | -1.64094      | -0.63879      | -0.09926      |
| C           | -1.10865      | 0.659798      | -0.20071      |
| C           | -1.93959      | 1.779812      | -0.22842      |
| H           | -3.41899      | -1.85109      | 0.051737      |
| H           | -1.52556      | 2.783477      | -0.30708      |
| C           | -0.53442      | -1.67247      | -0.08962      |
| C           | 0.695762      | -0.79719      | -0.19907      |
| C           | 2.020585      | -1.19196      | -0.23979      |
| C           | 2.988076      | -0.19844      | -0.3487       |
| C           | 2.634653      | 1.168563      | -0.41483      |
| C           | 1.313166      | 1.554739      | -0.37126      |
| C           | 0.340336      | 0.558316      | -0.26297      |
| H           | 2.301487      | -2.24232      | -0.19089      |
| H           | 1.034615      | 2.606167      | -0.42182      |
| C           | -5.26359      | 0.406128      | -0.00355      |
| C           | -4.4065       | 2.623111      | -0.1657       |
| C           | -5.62549      | 1.742295      | -0.06551      |
| C           | 4.42916       | -0.25134      | -0.42182      |
| C           | 3.870515      | 2.047138      | -0.53733      |
| C           | 4.961428      | 1.00623       | -0.52793      |
| C           | -7.70523      | 0.711604      | 0.076224      |
| C           | -6.99582      | 1.917216      | -0.0199       |
| H           | -7.51603      | 2.871124      | -0.05177      |
| S           | -6.59268      | -0.66616      | 0.110013      |

|   |          |          |          |
|---|----------|----------|----------|
| C | 6.364624 | 1.011729 | -0.61682 |
| H | 6.977001 | 1.899534 | -0.74103 |
| C | 6.899538 | -0.25402 | -0.57668 |
| S | 5.644334 | -1.47162 | -0.41521 |
| C | -9.11408 | 0.728027 | 0.130225 |
| H | -9.46793 | 1.753924 | 0.087947 |
| C | -11.1613 | -2.33549 | 0.299966 |
| C | -12.1624 | -1.36022 | 0.287879 |
| C | -13.4952 | -1.76158 | 0.307972 |
| C | -13.7763 | -3.12302 | 0.339144 |
| C | -12.7658 | -4.08021 | 0.353122 |
| C | -11.435  | -3.68716 | 0.333844 |
| C | -10.0854 | -0.23705 | 0.214146 |
| H | -14.3114 | -1.05121 | 0.298091 |
| H | -14.8133 | -3.44297 | 0.352684 |
| H | -13.0246 | -5.13391 | 0.37788  |
| H | -10.6181 | -4.40225 | 0.342465 |
| C | -9.83867 | -1.68698 | 0.261859 |
| O | -8.76747 | -2.25726 | 0.266182 |
| C | -11.5256 | -0.02528 | 0.249354 |
| C | -12.2143 | 1.1639   | 0.257917 |
| C | -11.5889 | 2.441276 | 0.233985 |
| N | -11.0975 | 3.487435 | 0.214403 |
| C | -13.6338 | 1.240643 | 0.298378 |
| N | -14.7846 | 1.339591 | 0.330544 |
| C | -0.53375 | -2.4676  | 1.215637 |
| H | 0.308059 | -3.16877 | 1.239797 |
| H | -0.45002 | -1.80126 | 2.080235 |

|   |          |          |          |
|---|----------|----------|----------|
| H | -1.45832 | -3.04732 | 1.316663 |
| C | -0.64969 | -2.61545 | -1.28715 |
| H | -1.57623 | -3.19836 | -1.23424 |
| H | -0.64944 | -2.05567 | -2.22803 |
| H | 0.190169 | -3.31914 | -1.30628 |
| C | 3.998549 | 2.996453 | 0.652997 |
| H | 4.932653 | 3.567008 | 0.588906 |
| H | 3.167328 | 3.71052  | 0.671674 |
| H | 3.998064 | 2.442533 | 1.597164 |
| C | 3.864099 | 2.831743 | -1.8484  |
| H | 3.767876 | 2.158651 | -2.7062  |
| H | 3.029807 | 3.542076 | -1.87188 |
| H | 4.795209 | 3.399775 | -1.95986 |
| C | -4.29668 | 3.558718 | 1.037485 |
| H | -3.37028 | 4.142196 | 0.991288 |
| H | -5.13832 | 4.260606 | 1.054637 |
| H | -4.30073 | 2.993948 | 1.97518  |
| C | -4.40209 | 3.421706 | -1.46818 |
| H | -3.4781  | 4.003194 | -1.56273 |
| H | -4.48088 | 2.758247 | -2.33526 |
| H | -5.24563 | 4.121109 | -1.49165 |
| C | 14.41252 | 0.463149 | 2.626423 |
| C | 13.29474 | 0.971264 | 1.978258 |
| C | 12.74546 | 0.310177 | 0.880549 |
| C | 13.3331  | -0.89315 | 0.47057  |
| C | 14.42518 | -1.41467 | 1.144715 |
| C | 14.98173 | -0.73027 | 2.216443 |
| C | 11.00885 | -1.32093 | -0.77854 |

|   |          |          |          |
|---|----------|----------|----------|
| C | 10.63853 | -0.07511 | -0.25303 |
| C | 9.285228 | 0.23467  | -0.17097 |
| H | 8.971511 | 1.163204 | 0.293376 |
| C | 8.302852 | -0.64375 | -0.64244 |
| C | 8.697205 | -1.87684 | -1.15988 |
| C | 10.03966 | -2.21388 | -1.20456 |
| H | 14.82833 | 1.005444 | 3.469708 |
| H | 12.84752 | 1.891358 | 2.337424 |
| H | 14.84854 | -2.35776 | 0.81121  |
| H | 15.84902 | -1.13382 | 2.728097 |
| H | 7.956137 | -2.56889 | -1.54792 |
| H | 10.34814 | -3.17627 | -1.60228 |
| N | 11.6311  | 0.816276 | 0.186104 |
| C | 11.26033 | 2.194248 | 0.407183 |
| H | 10.62236 | 2.529231 | -0.41384 |
| H | 10.72487 | 2.361641 | 1.355552 |
| H | 12.16065 | 2.812726 | 0.405746 |
| S | 12.72645 | -1.70036 | -0.98953 |

**Table S6:** Cartesian coordinates of **FHD5**

| <b>Atom</b> | <b>X-axis</b> | <b>Y-axis</b> | <b>Z-axis</b> |
|-------------|---------------|---------------|---------------|
| C           | -3.08057      | 1.57221       | -0.19492      |
| C           | -3.61136      | 0.26601       | -0.1187       |
| C           | -2.7829       | -0.85622      | -0.11488      |
| C           | -1.4224       | -0.64648      | -0.18765      |
| C           | -0.88833      | 0.653326      | -0.26412      |
| C           | -1.71797      | 1.774646      | -0.2689       |
| H           | -3.20148      | -1.85922      | -0.05552      |

|   |          |          |          |
|---|----------|----------|----------|
| H | -1.30279 | 2.779187 | -0.32786 |
| C | -0.31703 | -1.68137 | -0.19837 |
| C | 0.914557 | -0.80538 | -0.2842  |
| C | 2.239439 | -1.20071 | -0.32177 |
| C | 3.209016 | -0.2063  | -0.40109 |
| C | 2.856647 | 1.162079 | -0.44379 |
| C | 1.535284 | 1.548613 | -0.40592 |
| C | 0.560553 | 0.551282 | -0.32446 |
| H | 2.51878  | -2.25212 | -0.28978 |
| H | 1.258605 | 2.601311 | -0.43707 |
| C | -5.04289 | 0.401613 | -0.05379 |
| C | -4.18323 | 2.619972 | -0.18027 |
| C | -5.40296 | 1.739445 | -0.08694 |
| C | 4.651136 | -0.25827 | -0.45223 |
| C | 4.094301 | 2.042108 | -0.52954 |
| C | 5.18486  | 1.001042 | -0.52138 |
| C | -7.48305 | 0.710011 | 0.059333 |
| C | -6.77224 | 1.915923 | -0.02278 |
| H | -7.2908  | 2.871238 | -0.02927 |
| S | -6.37284 | -0.67024 | 0.054257 |
| C | 6.590084 | 1.009396 | -0.5771  |
| H | 7.204818 | 1.899555 | -0.66902 |
| C | 7.12517  | -0.25622 | -0.54825 |
| S | 5.868491 | -1.47771 | -0.43992 |
| C | -8.89053 | 0.728239 | 0.13753  |
| H | -9.24276 | 1.755479 | 0.120742 |
| C | -10.9423 | -2.33355 | 0.284758 |
| C | -11.9407 | -1.35587 | 0.314964 |

|   |          |          |          |
|---|----------|----------|----------|
| C | -13.2739 | -1.7543  | 0.354056 |
| C | -13.5582 | -3.11542 | 0.361598 |
| C | -12.5505 | -4.0751  | 0.333406 |
| C | -11.2192 | -3.68494 | 0.2949   |
| C | -9.8625  | -0.23639 | 0.221611 |
| H | -14.0881 | -1.04192 | 0.376636 |
| H | -14.5957 | -3.43308 | 0.389822 |
| H | -12.8117 | -5.12846 | 0.340758 |
| H | -10.4044 | -4.40206 | 0.270686 |
| C | -9.61888 | -1.68747 | 0.232704 |
| O | -8.54956 | -2.26043 | 0.201123 |
| C | -11.3009 | -0.02203 | 0.292435 |
| C | -11.9854 | 1.168501 | 0.344327 |
| C | -11.3565 | 2.444314 | 0.336464 |
| N | -10.8624 | 3.489391 | 0.330367 |
| C | -13.4034 | 1.248147 | 0.419554 |
| N | -14.5527 | 1.349621 | 0.481018 |
| C | -0.32162 | -2.50706 | 1.087598 |
| H | 0.519599 | -3.2093  | 1.098648 |
| H | -0.24096 | -1.8614  | 1.968017 |
| H | -1.24673 | -3.08867 | 1.171431 |
| C | -0.42954 | -2.5956  | -1.41839 |
| H | -1.35596 | -3.17997 | -1.38128 |
| H | -0.42768 | -2.01327 | -2.34547 |
| H | 0.411002 | -3.29795 | -1.45271 |
| C | 4.202782 | 2.968104 | 0.680938 |
| H | 5.137318 | 3.54034  | 0.642658 |
| H | 3.370799 | 3.681305 | 0.701085 |

|   |          |          |          |
|---|----------|----------|----------|
| H | 4.18817  | 2.395394 | 1.613731 |
| C | 4.109443 | 2.85173  | -1.82516 |
| H | 4.029986 | 2.194897 | -2.69717 |
| H | 3.274015 | 3.560764 | -1.84994 |
| H | 5.041244 | 3.423387 | -1.90919 |
| C | -4.0646  | 3.535063 | 1.037736 |
| H | -3.13862 | 4.119444 | 0.994959 |
| H | -4.90604 | 4.236551 | 1.072697 |
| H | -4.06213 | 2.954481 | 1.965727 |
| C | -4.18567 | 3.440408 | -1.46911 |
| H | -3.26084 | 4.021201 | -1.55975 |
| H | -4.27153 | 2.791823 | -2.34669 |
| H | -5.02773 | 4.141964 | -1.47527 |
| C | 15.12353 | 0.072757 | 2.069504 |
| C | 13.92231 | 0.705942 | 1.76537  |
| C | 13.04325 | 0.149825 | 0.843044 |
| C | 13.38454 | -1.07774 | 0.263561 |
| C | 14.56565 | -1.71403 | 0.574516 |
| C | 15.45122 | -1.13165 | 1.475681 |
| C | 11.23125 | -1.31545 | -0.60304 |
| C | 10.84048 | -0.08933 | -0.04737 |
| C | 9.488487 | 0.218554 | -0.01706 |
| H | 9.151515 | 1.125182 | 0.473304 |
| C | 8.531104 | -0.64229 | -0.57369 |
| C | 8.953397 | -1.84402 | -1.13428 |
| C | 10.3002  | -2.18153 | -1.13128 |
| H | 15.79866 | 0.532621 | 2.783673 |
| H | 13.67261 | 1.639676 | 2.256836 |

|   |          |          |          |
|---|----------|----------|----------|
| H | 14.7786  | -2.66147 | 0.090245 |
| H | 16.38667 | -1.62748 | 1.711241 |
| H | 8.233796 | -2.51418 | -1.59383 |
| H | 10.65395 | -3.11276 | -1.56111 |
| O | 12.55353 | -1.6667  | -0.65743 |
| N | 11.83765 | 0.747287 | 0.457732 |
| C | 11.50878 | 2.073384 | 0.90788  |
| H | 10.78144 | 2.517455 | 0.224127 |
| H | 11.09073 | 2.094438 | 1.92656  |
| H | 12.40455 | 2.698109 | 0.886019 |

**Table S7:** Cartesian coordinates of **FHD6**

| <b>Atom</b> | <b>X-axis</b> | <b>Y-axis</b> | <b>Z-axis</b> |
|-------------|---------------|---------------|---------------|
| C           | 2.734173      | 1.538168      | -0.07177      |
| C           | 3.293149      | 0.244226      | 0.011405      |
| C           | 2.488367      | -0.89415      | 0.061144      |
| C           | 1.122699      | -0.7132       | 0.02539       |
| C           | 0.559859      | 0.574406      | -0.05708      |
| C           | 1.366027      | 1.711894      | -0.10586      |
| H           | 2.929178      | -1.88734      | 0.1246        |
| H           | 0.928467      | 2.706459      | -0.17143      |
| C           | 0.038947      | -1.7699       | 0.059854      |
| C           | -1.21193      | -0.92066      | -0.0142       |
| C           | -2.52823      | -1.34512      | -0.02444      |
| C           | -3.52061      | -0.37329      | -0.10234      |
| C           | -3.19828      | 1.001917      | -0.16732      |
| C           | -1.8854       | 1.417428      | -0.15598      |



|   |          |          |          |
|---|----------|----------|----------|
| C | -0.88748 | 0.442332 | -0.07971 |
| H | -2.78381 | -2.40191 | 0.024713 |
| H | -1.63257 | 2.475414 | -0.20659 |
| C | 4.722705 | 0.407548 | 0.021794 |
| C | 3.816279 | 2.606528 | -0.11413 |
| C | 5.055884 | 1.751002 | -0.05073 |
| C | -4.96119 | -0.45755 | -0.13771 |
| C | -4.45625 | 1.853414 | -0.24838 |
| C | -5.52348 | 0.788862 | -0.21811 |
| C | 7.159454 | 0.762038 | 0.027749 |
| C | 6.422696 | 1.953227 | -0.04776 |
| H | 6.922455 | 2.917137 | -0.09989 |
| S | 6.075903 | -0.6376  | 0.097847 |
| C | -6.92884 | 0.764653 | -0.26998 |
| H | -7.565   | 1.638592 | -0.3703  |
| C | -7.43526 | -0.5121  | -0.22784 |
| S | -6.15101 | -1.70367 | -0.11067 |
| C | 8.568046 | 0.805677 | 0.026494 |
| H | 8.899863 | 1.837863 | -0.03525 |
| C | 10.67917 | -2.21596 | 0.179116 |
| C | 11.66049 | -1.22373 | 0.105217 |
| C | 13.00047 | -1.60071 | 0.094241 |
| C | 13.30783 | -2.95544 | 0.156477 |
| C | 12.31673 | -3.92965 | 0.231059 |
| C | 10.97877 | -3.56093 | 0.243351 |
| C | 9.560878 | -0.14043 | 0.078812 |
| H | 13.80292 | -0.87738 | 0.037469 |
| H | 14.35064 | -3.2562  | 0.146691 |

|   |          |          |          |
|---|----------|----------|----------|
| H | 12.59578 | -4.97739 | 0.278335 |
| H | 10.17577 | -4.28946 | 0.300021 |
| C | 9.343964 | -1.59274 | 0.168858 |
| O | 8.285312 | -2.18353 | 0.224801 |
| C | 10.99693 | 0.09783  | 0.047524 |
| C | 11.66296 | 1.298159 | -0.02212 |
| C | 11.01349 | 2.562419 | -0.07375 |
| N | 10.50297 | 3.598716 | -0.11638 |
| C | 13.08114 | 1.401091 | -0.04869 |
| N | 14.23011 | 1.521521 | -0.0725  |
| C | 0.143332 | -2.70643 | -1.14368 |
| H | -0.6825  | -3.42681 | -1.14463 |
| H | 0.108085 | -2.14355 | -2.08204 |
| H | 1.082589 | -3.27056 | -1.11608 |
| C | 0.08861  | -2.56925 | 1.361749 |
| H | 1.025865 | -3.13265 | 1.435629 |
| H | 0.016447 | -1.9071  | 2.230613 |
| H | -0.73957 | -3.28549 | 1.406594 |
| C | -4.50322 | 2.649018 | -1.55203 |
| H | -5.44854 | 3.198725 | -1.63166 |
| H | -3.68423 | 3.37627  | -1.59377 |
| H | -4.41876 | 1.984747 | -2.41795 |
| C | -4.57154 | 2.789895 | 0.953348 |
| H | -4.53442 | 2.227717 | 1.891912 |
| H | -3.75486 | 3.52093  | 0.95657  |
| H | -5.51895 | 3.340781 | 0.919361 |
| C | 3.758261 | 3.406309 | -1.4147  |
| H | 2.821724 | 3.971514 | -1.4808  |

|   |          |          |          |
|---|----------|----------|----------|
| H | 4.588171 | 4.120701 | -1.46248 |
| H | 3.822832 | 2.745133 | -2.2847  |
| C | 3.722283 | 3.538788 | 1.09296  |
| H | 2.78263  | 4.102319 | 1.074393 |
| H | 3.765557 | 2.973491 | 2.029349 |
| H | 4.549047 | 4.258343 | 1.08642  |
| C | -13.5592 | 0.353587 | 0.324599 |
| C | -13.7506 | -0.73539 | -0.73416 |
| C | -11.5327 | -1.6648  | -0.36018 |
| C | -11.1704 | -0.42986 | 0.216487 |
| C | -9.81616 | -0.08517 | 0.252712 |
| H | -9.50149 | 0.847627 | 0.706857 |
| C | -8.83256 | -0.93322 | -0.26543 |
| C | -9.20958 | -2.14874 | -0.83279 |
| C | -10.5529 | -2.49162 | -0.87489 |
| H | -8.46383 | -2.80537 | -1.26988 |
| H | -10.8547 | -3.43462 | -1.32576 |
| N | -12.149  | 0.374963 | 0.781831 |
| C | -11.7282 | 1.518808 | 1.551232 |
| H | -10.9516 | 1.228056 | 2.2657   |
| H | -11.3332 | 2.342655 | 0.933358 |
| H | -12.5677 | 1.909814 | 2.129244 |
| C | -12.9857 | -2.00242 | -0.39954 |
| H | -13.3177 | -2.39903 | 0.571863 |
| H | -13.1774 | -2.78676 | -1.13973 |
| C | -13.9297 | 1.693459 | -0.31127 |
| H | -14.9274 | 1.62909  | -0.75957 |
| H | -13.9487 | 2.51097  | 0.41598  |

|   |          |          |          |
|---|----------|----------|----------|
| H | -13.2164 | 1.950635 | -1.10232 |
| C | -14.4753 | 0.073562 | 1.514004 |
| H | -14.3348 | 0.803637 | 2.31718  |
| H | -15.5254 | 0.125695 | 1.204179 |
| H | -14.2866 | -0.91967 | 1.932334 |
| H | -13.3942 | -0.36268 | -1.70458 |
| H | -14.8263 | -0.92105 | -0.83789 |

**Table S8:** Summarized structural parameters of compound **FH**, bond length (Å) and bond angles.

| Bond Lengths |       | Bond Angles |       |
|--------------|-------|-------------|-------|
| DFT          |       | DFT         |       |
| C1-C2        | 1.413 | C2-C1-C6    | 120.6 |
| C1-C6        | 1.379 | C2-C1-C15   | 111.4 |
| C1-C15       | 1.52  | C1-C2-C3    | 121.5 |
| C2-C3        | 1.394 | C1-C2-C14   | 106.8 |
| C2-C14       | 1.441 | C6-C1-C15   | 128   |
| C3-C4        | 1.38  | C1-C6-C5    | 118   |
| C4-C5        | 1.406 | C1-C15-C16  | 100.6 |
| C4-C7        | 1.514 | C1-C15-C62  | 111.3 |
| C5-C6        | 1.395 | C1-C15-C63  | 111.3 |
| C5-C13       | 1.453 | C3-C2-C14   | 131.8 |
| C7-C8        | 1.514 | C2-C3-C4    | 117.6 |
| C7-C58       | 1.528 | C2-C14-C16  | 110.3 |
| C7-C59       | 1.528 | C2-C14-S22  | 135.9 |
| C8-C9        | 1.38  | C3-C4-C5    | 121   |
| C8-C13       | 1.406 | C3-C4-C7    | 128.2 |
| C9-C10       | 1.394 | C5-C4-C7    | 110.8 |
| C10-C11      | 1.413 | C4-C5-C6    | 121.3 |
| C10-C17      | 1.441 | C4-C5-C13   | 108.5 |
| C11-C12      | 1.379 | C4-C7-C8    | 101.5 |
| C11-C18      | 1.52  | C4-C7-C58   | 111.2 |
| C12-C13      | 1.395 | C4-C7-C59   | 111.2 |
| C14-C16      | 1.384 | C6-C5-C13   | 130.2 |
| C14-S22      | 1.712 | C5-C13-C8   | 108.5 |
| C15-C16      | 1.507 | C5-C13-C12  | 130.2 |
| C15-C62      | 1.528 | C8-C7-C58   | 111.2 |
| C15-C63      | 1.528 | C8-C7-C59   | 111.2 |

|         |       |             |       |
|---------|-------|-------------|-------|
| C16-C21 | 1.384 | C7-C8-C9    | 128.2 |
| C17-C19 | 1.384 | C7-C8-C13   | 110.8 |
| C17-S25 | 1.712 | C58-C7-C59  | 110.5 |
| C18-C19 | 1.507 | C9-C8-C13   | 121   |
| C18-C60 | 1.528 | C8-C9-C10   | 117.6 |
| C18-C61 | 1.528 | C8-C13-C12  | 121.3 |
| C19-C23 | 1.384 | C9-C10-C11  | 121.5 |
| C20-C21 | 1.4   | C9-C10-C17  | 131.8 |
| C20-S22 | 1.769 | C11-C10-C17 | 106.8 |
| C20-C27 | 1.412 | C10-C11-C12 | 120.6 |
| C23-C24 | 1.4   | C10-C11-C18 | 111.4 |
| C24-S25 | 1.769 | C10-C17-C19 | 110.3 |
| C24-C26 | 1.412 | C10-C17-C25 | 135.9 |
| C26-C41 | 1.369 | C12-C11-C18 | 128   |
| C27-C34 | 1.369 | C11-C12-C13 | 118   |
| C28-C29 | 1.398 | C11-C18-C19 | 100.6 |
| C28-C33 | 1.38  | C11-C18-C60 | 111.3 |
| C28-C42 | 1.474 | C11-C18-C61 | 111.3 |
| C29-C30 | 1.392 | C16-C14-S22 | 113.8 |
| C29-C48 | 1.478 | C14-C16-C15 | 111   |
| C30-C31 | 1.39  | C14-C16-C21 | 112.3 |
| C31-C32 | 1.392 | C14-S22-C20 | 89.9  |
| C32-C33 | 1.388 | C16-C15-C62 | 111.3 |
| C34-C42 | 1.473 | C16-C15-C63 | 111.3 |
| C34-C48 | 1.457 | C15-C16-C21 | 136.7 |
| C35-C36 | 1.398 | C62-C15-C63 | 110.6 |
| C35-C40 | 1.392 | C16-C21-C20 | 113.2 |
| C35-C46 | 1.478 | C19-C17-S25 | 113.8 |
| C36-C37 | 1.38  | C17-C19-C18 | 111   |
| C36-C44 | 1.474 | C17-C19-C23 | 112.3 |
| C37-C38 | 1.388 | C17-S25-C24 | 89.9  |
| C38-C39 | 1.392 | C19-C18-C60 | 111.3 |
| C39-C40 | 1.39  | C19-C18-C61 | 111.3 |
| C41-C44 | 1.473 | C18-C19-C23 | 136.7 |
| C41-C46 | 1.457 | C60-C18-C61 | 110.6 |
| C42-O43 | 1.213 | C19-C23-C24 | 113.2 |
| C44-O45 | 1.213 | C21-C20-S22 | 110.8 |
| C46-C47 | 1.374 | C21-C20-C27 | 119.9 |
| C47-C54 | 1.423 | S22-C20-C27 | 129.4 |
| C47-C56 | 1.422 | C20-C27-C34 | 134.6 |
| C48-C49 | 1.374 | C23-C24-S25 | 110.8 |
| C49-C50 | 1.423 | C23-C24-C26 | 119.9 |

|         |       |             |       |
|---------|-------|-------------|-------|
| C49-C52 | 1.422 | S25-C24-C26 | 129.4 |
| C50-N51 | 1.156 | C24-C26-C41 | 134.6 |
| C52-N53 | 1.155 | C26-C41-C44 | 125.5 |
| C54-N55 | 1.156 | C26-C41-C46 | 126.5 |
| C56-N57 | 1.155 | C27-C34-C42 | 125.5 |

**Table S8 continued.....**

| <b>Bond Angles</b> |       |
|--------------------|-------|
| C27-C34-C48        | 126.5 |
| C29-C28-C33        | 122.6 |
| C29-C28-C42        | 109.6 |
| C28-C29-C30        | 119.1 |
| C28-C29-C48        | 108.9 |
| C33-C28-C42        | 127.8 |
| C28-C33-C32        | 118   |
| C28-C42-C34        | 106.4 |
| C28-C42-O43        | 126   |
| C30-C29-C48        | 132   |
| C29-C30-C31        | 118.4 |
| C29-C48-C34        | 107.1 |
| C29-C48-C49        | 124.5 |
| C30-C31-C32        | 121.7 |
| C31-C32-C33        | 120.1 |
| C42-C34-C48        | 108   |
| C34-C42-O43        | 127.5 |
| C34-C48-C49        | 128.3 |
| C36-C35-C40        | 119.1 |
| C36-C35-C46        | 108.9 |
| C35-C36-C37        | 122.6 |
| C35-C36-C44        | 109.6 |
| C40-C35-C46        | 132   |
| C35-C40-C39        | 118.4 |
| C35-C46-C41        | 107.1 |
| C35-C46-C47        | 124.5 |
| C37-C36-C44        | 127.8 |
| C36-C37-C38        | 118   |
| C36-C44-C41        | 106.4 |
| C36-C44-O45        | 126   |
| C37-C38-C39        | 120.1 |
| C38-C39-C40        | 121.7 |
| C44-C41-C46        | 108   |
| C41-C44-O45        | 127.5 |
| C41-C46-C47        | 128.3 |

|             |       |
|-------------|-------|
| C46-C47-C54 | 123.8 |
| C46-C47-C56 | 123.2 |
| C54-C47-C56 | 112.9 |
| C47-C54-N55 | 179.1 |
| C47-C56-N57 | 178.2 |
| C48-C49-C50 | 123.8 |
| C48-C49-C52 | 123.2 |
| C50-C49-C52 | 112.9 |
| C49-C50-N51 | 179.1 |
| C49-C52-N53 | 178.2 |

**Table S9:** Summarized structural parameters of compound **FHD1**, bond length (Å) and bond angles.

| Bond Lengths |       | Bond Angles |       |
|--------------|-------|-------------|-------|
| DFT          |       | DFT         |       |
| C1-C2        | 1.412 | C2-C1-C6    | 120.7 |
| C1-C6        | 1.379 | C2-C1-C15   | 111.4 |
| C1-C15       | 1.52  | C1-C2-C3    | 121.4 |
| C2-C3        | 1.395 | C1-C2-C14   | 106.8 |
| C2-C1        | 1.44  | C6-C1-C15   | 128   |
| C3-C4        | 1.379 | C1-C6-C5    | 118   |
| C4-C5        | 1.407 | C1-C15-C16  | 100.7 |
| C4-C7        | 1.514 | C1-C15-C45  | 111.4 |
| C5-C6        | 1.395 | C1-C15-C46  | 111.3 |
| C5-C13       | 1.453 | C3-C2-C14   | 131.8 |
| C7-C8        | 1.514 | C2-C3-C4    | 117.7 |
| C7-C41       | 1.529 | C2-C14-C16  | 110.3 |
| C7-C42       | 1.528 | C2-C14-S22  | 135.9 |
| C8-C9        | 1.383 | C3-C4-C5    | 121.1 |
| C8-C13       | 1.403 | C3-C4-C7    | 128.2 |
| C9-C10       | 1.391 | C5-C4-C7    | 110.6 |
| C10-C11      | 1.414 | C4-C5-C6    | 121.2 |
| C10-C17      | 1.444 | C4-C5-C13   | 108.5 |
| C11-C12      | 1.377 | C4-C7-C8    | 101.5 |
| C11-C18      | 1.521 | C4-C7-C41   | 111.1 |
| C12-C13      | 1.397 | C4-C7-C42   | 111.2 |
| C14-C16      | 1.386 | C6-C5-C13   | 130.4 |
| C14-S22      | 1.712 | C5-C13-C8   | 108.6 |
| C15-C16      | 1.507 | C5-C13-C12  | 130.3 |
| C15-C45      | 1.528 | C8-C7-C41   | 111.1 |
| C15-C46      | 1.528 | C8-C7-C42   | 111.2 |
| C16-C21      | 1.382 | C7-C8-C9    | 128.1 |

|         |       |             |       |
|---------|-------|-------------|-------|
| C17-C19 | 1.37  | C7-C8-C13   | 110.8 |
| C17-S24 | 1.722 | C41-C7-C42  | 110.4 |
| C18-C19 | 1.507 | C9-C8-C13   | 121.1 |
| C18-C43 | 1.528 | C8-C9-C10   | 117.7 |
| C18-C44 | 1.528 | C8-C13-C12  | 121.1 |
| C19-C23 | 1.406 | C9-C10-C11  | 121.3 |
| C20-C21 | 1.402 | C9-C10-C17  | 132.3 |
| C20-S22 | 1.771 | C11-C10-C17 | 106.4 |
| C20-C25 | 1.409 | C10-C11-C12 | 120.7 |
| C23-C60 | 1.375 | C10-C11-C18 | 111   |
| S24-C60 | 1.757 | C10-C17-C19 | 111   |
| C25-C32 | 1.372 | C10-C17-S24 | 136.9 |
| C26-C27 | 1.398 | C12-C11-C18 | 128.3 |
| C26-C31 | 1.38  | C11-C12-C13 | 118.1 |
| C26-C33 | 1.475 | C11-C18-C19 | 100.9 |
| C27-C28 | 1.392 | C11-C18-C43 | 111.3 |
| C27-C35 | 1.479 | C11-C18-C44 | 111.3 |
| C28-C29 | 1.39  | C16-C14-S22 | 113.8 |
| C29-C30 | 1.392 | C14-C16-C15 | 110.8 |
| C30-C31 | 1.388 | C14-C16-C21 | 112.4 |
| C32-C33 | 1.471 | C14-S22-C20 | 90    |
| C32-C35 | 1.455 | C16-C15-C45 | 111.4 |
| C33-O34 | 1.213 | C16-C15-C46 | 111.3 |
| C35-C36 | 1.374 | C15-C16-C21 | 136.8 |
| C36-C37 | 1.422 | C45-C15-C46 | 110.6 |
| C36-C39 | 1.422 | C16-C21-C20 | 113.2 |
| C37-N38 | 1.156 | C19-C17-S24 | 112.1 |
| C39-N40 | 1.156 | C17-C19-C18 | 110.7 |
| C47-C48 | 1.403 | C17-C19-C23 | 113.4 |
| C47-C52 | 1.383 | C17-C24-C60 | 90.8  |
| C48-C49 | 1.401 | C19-C18-C43 | 111.4 |
| C48-C60 | 1.458 | C19-C18-C44 | 111.2 |
| C49-C50 | 1.379 | C18-C19-C23 | 135.9 |
| C50-C51 | 1.401 | C43-C18-C44 | 110.6 |
| C50-C53 | 1.503 | C19-C23-C60 | 112.5 |
| C51-C52 | 1.389 | C21-C20-S22 | 110.7 |
| C51-C59 | 1.458 | C21-C20-C25 | 119.9 |
| C53-C54 | 1.503 | S22-C20-C25 | 129.4 |
| C54-C55 | 1.382 | C20-C25-C32 | 134.6 |
| C54-C59 | 1.402 | C23-C60-S24 | 111.2 |
| C55-C56 | 1.391 | C23-C60-C48 | 128.3 |
| C56-C57 | 1.392 | S24-C60-C48 | 120.4 |



|         |       |             |       |
|---------|-------|-------------|-------|
| C57-C58 | 1.387 | C25-C32-C33 | 125.4 |
| C58-C59 | 1.389 | C25-C32-C35 | 126.5 |

Table S9 continued.....

| Bond Angles |       |
|-------------|-------|
| C27-C26-C31 | 122.7 |
| C27-C26-C33 | 109.6 |
| C26-C27-C28 | 119.1 |
| C26-C27-C35 | 108.8 |
| C31-C26-C33 | 127.8 |
| C26-C31-C30 | 118   |
| C26-C33-C32 | 106.5 |
| C26-C33-O34 | 125.9 |
| C28-C27-C35 | 132.1 |
| C27-C28-C29 | 118.4 |
| C27-C35-C32 | 107.1 |
| C27-C35-C36 | 124.4 |
| C28-C29-C30 | 121.7 |
| C29-C30-C31 | 120.1 |
| C33-C32-C35 | 108   |
| C32-C33-O34 | 127.6 |
| C32-C35-C36 | 128.4 |
| C35-C36-C37 | 123.9 |
| C35-C36-C39 | 123.2 |
| C37-C36-C39 | 112.9 |
| C36-C37-N38 | 179   |
| C36-C39-N40 | 178.2 |
| C48-C47-C52 | 121.5 |
| C47-C48-C49 | 118.9 |
| C47-C48-C60 | 119.7 |
| C47-C52-C51 | 119.1 |
| C49-C48-C60 | 121.4 |
| C48-C49-C50 | 119.8 |
| C49-C50-C51 | 120.7 |
| C49-C50-C53 | 129.3 |
| C51-C50-C53 | 110   |
| C50-C51-C52 | 120   |
| C50-C51-C59 | 108.7 |
| C50-C53-C54 | 102.9 |
| C52-C51-C59 | 131.3 |
| C51-C59-C54 | 108.5 |
| C51-C59-C58 | 131   |
| C53-C54-C55 | 129.6 |

|             |       |
|-------------|-------|
| C53-C54-C59 | 110   |
| C55-C54-C59 | 120.4 |
| C54-C55-C56 | 119   |
| C54-C59-C58 | 120.6 |
| C55-C56-C57 | 120.7 |
| C56-C57-C58 | 120.6 |
| C57-C58-C59 | 118.8 |

**Table S10:** Summarized structural parameters of compound **FHD2**, bond length (Å) and bond angles.

| Bond Lengths |       | Bond Angles |       |
|--------------|-------|-------------|-------|
| DFT          |       | DFT         |       |
| C1-C2        | 1.412 | C1-C2-C3    | 121.4 |
| C2-C3        | 1.395 | C2-C1-C6    | 120.7 |
| C3-C4        | 1.379 | C1-C2-C14   | 106.8 |
| C4-C5        | 1.407 | C2-C1-C15   | 111.4 |
| C5-C6        | 1.395 | C2-C3-C4    | 117.7 |
| C1-C6        | 1.379 | C3-C2-C14   | 131.8 |
| C4-C7        | 1.514 | C3-C4-C5    | 121.1 |
| C7-C8        | 1.514 | C3-C4-C7    | 128.3 |
| C8-C9        | 1.384 | C4-C5-C6    | 121.2 |
| C9-C10       | 1.392 | C5-C4-C7    | 110.6 |
| C10-C11      | 1.414 | C4-C5-C13   | 108.5 |
| C11-C12      | 1.377 | C5-C6-C1    | 118.0 |
| C8-C13       | 1.403 | C6-C5-C13   | 130.3 |
| C5-C13       | 1.453 | C6-C1-C15   | 128.0 |
| C12-C13      | 1.397 | C4-C7-C8    | 101.5 |
| C2-C14       | 1.440 | C4-C7-C41   | 111.2 |
| C1-C15       | 1.520 | C4-C7-C42   | 111.1 |
| C14-C16      | 1.386 | C7-C8-C9    | 128.1 |
| C15-C16      | 1.507 | C7-C8-C13   | 110.8 |
| C10-C17      | 1.444 | C8-C7-C41   | 111.2 |
| C11-C18      | 1.521 | C8-C7-C42   | 111.1 |
| C17-C19      | 1.370 | C8-C9-C10   | 117.7 |
| C18-C19      | 1.507 | C9-C8-C13   | 121.1 |
| C16-C21      | 1.382 | C9-C10-C11  | 121.3 |
| C20-C21      | 1.402 | C9-C10-C17  | 132.3 |
| C14-S22      | 1.712 | C10-C11-C12 | 120.7 |
| C20-S22      | 1.771 | C11-C10-C17 | 106.4 |
| C19-C23      | 1.406 | C10-C11-C18 | 111.0 |
| C17-S24      | 1.723 | C11-C12-C13 | 118.1 |
| C20-C25      | 1.409 | C12-C11-C18 | 128.3 |
| C26-C27      | 1.398 | C8-C13-C5   | 108.6 |
| C27-C28      | 1.392 | C8-C13-C12  | 121.1 |
| C28-C29      | 1.390 | C5-C13-C12  | 130.3 |
| C29-C30      | 1.392 | C2-C14-C16  | 110.3 |
| C30-C31      | 1.388 | C2-C14-S22  | 135.9 |
| C26-C31      | 1.380 | C1-C15-C16  | 100.7 |
| C25-C32      | 1.372 | C1-C15-C45  | 111.3 |

|         |       |             |       |
|---------|-------|-------------|-------|
| C26-C33 | 1.475 | C1-C15-C46  | 111.4 |
| C32-C33 | 1.471 | C14-C16-C15 | 110.8 |
| C33-O34 | 1.213 | C14-C16-C21 | 112.4 |
| C27-C35 | 1.479 | C16-C14-S22 | 113.8 |
| C32-C35 | 1.455 | C15-C16-C21 | 136.8 |
| C35-C36 | 1.375 | C16-C15-C45 | 111.3 |
| C36-C37 | 1.422 | C16-C15-C46 | 111.4 |
| C37-N38 | 1.156 | C10-C17-C19 | 111.0 |
| C36-C39 | 1.422 | C10-C17-S24 | 137.0 |
| C39-N40 | 1.156 | C11-C18-C19 | 100.9 |
| C7-C41  | 1.528 | C11-C18-C43 | 111.2 |
| C7-C42  | 1.529 | C11-C18-N44 | 111.3 |
| C18-C43 | 1.528 | C17-C19-C18 | 110.7 |
| C18-C44 | 1.528 | C17-C19-C23 | 113.4 |
| C15-C45 | 1.528 | C19-C17-C24 | 112.0 |
| C15-C46 | 1.528 | C18-C19-C23 | 135.9 |
| C47-C48 | 1.400 | C19-C18-C43 | 111.2 |
| C48-C49 | 1.398 | C19-C18-N44 | 111.3 |
| C49-C50 | 1.381 | C16-C21-C20 | 113.2 |
| C50-C51 | 1.396 | C21-C20-S22 | 110.7 |
| C47-C52 | 1.380 | C21-C20-C25 | 119.9 |
| C51-C52 | 1.397 | C14-S22-C20 | 90.0  |
| C24-C53 | 1.757 | S22-C20-C25 | 129.4 |
| C48-C53 | 1.456 | C19-C23-C53 | 112.5 |
| C23-C53 | 1.375 | C17-C24-C53 | 90.8  |
| C51-N54 | 1.408 | C20-C25-C32 | 134.6 |
| N54-C55 | 1.413 | C26-C27-C28 | 119.1 |
| C55-C56 | 1.396 | C27-C26-C31 | 122.7 |
| C55-C57 | 1.395 | C27-C26-C33 | 109.6 |
| C56-C58 | 1.385 | C26-C27-C35 | 108.8 |
| C57-C59 | 1.385 | C27-C28-C29 | 118.4 |
| C59-C60 | 1.388 | C28-27-C35  | 132.1 |
| C58-C60 | 1.388 | C28-C29-C30 | 121.7 |
| N54-C61 | 1.415 | C29-C30-C31 | 120.1 |
| C61-C62 | 1.394 | C30-C31-C26 | 118.0 |
| C61-C63 | 1.395 | C31-C26-C33 | 127.8 |
| C62-C64 | 1.385 | C25-C32-C33 | 125.4 |
| C63-C65 | 1.385 | C25-C32-C35 | 126.6 |
| C65-C66 | 1.388 | C26-C33-C32 | 106.4 |
| C64-C66 | 1.388 | C26-C33-O34 | 125.9 |

Table S10 continued....

| <b>Bond Angles</b> |       |
|--------------------|-------|
| C32-C33-O34        | 127.6 |
| C33-C32-C35        | 108.0 |
| C27-C35-C32        | 107.1 |
| C27-C35-C36        | 124.4 |
| C32-C35-C36        | 128.4 |
| C35-C36-C37        | 123.9 |
| C35-C36-C39        | 123.2 |
| C36-C37-N38        | 179.0 |

|             |       |
|-------------|-------|
| C37-C36-C39 | 112.9 |
| C36-C39-N40 | 178.2 |
| C41-C7-C42  | 110.4 |
| C43-C18-C44 | 110.5 |
| C45-C15-C46 | 110.6 |
| C47-C48-C49 | 117.6 |
| C48-C47-C52 | 121.3 |
| C47-C48-C53 | 120.3 |
| C48-C49-C50 | 121.4 |
| C49-C48-C53 | 122.1 |
| C49-C50-C51 | 120.6 |
| C50-C51-C52 | 118.5 |
| C50-C51-N54 | 121.0 |
| C47-C52-C51 | 120.6 |
| C52-C51-N54 | 120.5 |
| S24-C53-C48 | 120.6 |
| S24-C53-C23 | 111.2 |
| C48-C53-C23 | 128.2 |
| C51-N54-C55 | 120.5 |
| C51-N54-C61 | 119.6 |
| N54-C55-C56 | 120.5 |
| N54-C55-C57 | 120.4 |
| C55-N54-C61 | 119.9 |
| C56-C55-C57 | 119.1 |
| C55-C56-C58 | 120.3 |
| C55-C57-C59 | 120.2 |
| C56-C58-C60 | 120.6 |
| C57-C59-C60 | 120.6 |
| C59-C60-C58 | 119.3 |
| N54-C61-C62 | 120.6 |
| N54-C61-C63 | 120.2 |
| C62-C61-C63 | 119.3 |
| C61-C62-C64 | 120.1 |
| C61-C63-C65 | 120.2 |
| C62-C64-C66 | 120.5 |
| C63-C65-C66 | 120.5 |
| C65-C66-C64 | 119.4 |

**Table S11:** Summarized structural parameters of compound **FHD3**, bond length (Å) and bond angles.

| <b>Bond Lengths</b> |       | <b>Bond Angles</b> |       |
|---------------------|-------|--------------------|-------|
| <b>DFT</b>          |       | <b>DFT</b>         |       |
| C1-C2               | 1.412 | C1-C2-C3           | 121.4 |
| C2-C3               | 1.395 | C2-C1-C6           | 120.6 |
| C3-C4               | 1.379 | C1-C2-C14          | 106.8 |
| C4-C5               | 1.407 | C2-C1-C15          | 111.3 |
| C1-C6               | 1.379 | C2-C3-C4           | 117.6 |
| C5-C6               | 1.395 | C3-C2-C14          | 131.7 |
| C4-C7               | 1.514 | C3-C4-C5           | 121.1 |
| C7-C8               | 1.514 | C3-C4-C7           | 128.2 |
| C8-C9               | 1.383 | C4-C5-C6           | 121.2 |

|          |       |             |       |
|----------|-------|-------------|-------|
| C9-C10   | 1.391 | C5-C4-C7    | 110.7 |
| C10-C11  | 1.414 | C4-C5-C13   | 108.4 |
| C11-C12  | 1.377 | C1-C6-C5    | 118.0 |
| C8-C13   | 1.403 | C6-C1-C15   | 128.0 |
| C5-C13   | 1.453 | C6-C5-C13   | 130.4 |
| C12-C13  | 1.397 | C4-C7-C8    | 101.5 |
| C2-C14   | 1.439 | C4-C7-C41   | 111.1 |
| C1-C15   | 1.520 | C4-C7-C42   | 111.1 |
| C14-C16  | 1.386 | C7-C8-C9    | 128.1 |
| C15-C16  | 1.507 | C7-C8-C13   | 110.8 |
| C10-C17  | 1.444 | C8-C7-C41   | 111.1 |
| C11-C18  | 1.521 | C8-C7-C42   | 111.3 |
| C17-C19  | 1.370 | C8-C9-C10   | 117.7 |
| C18-C19  | 1.508 | C9-C8-C13   | 121.1 |
| C20-C21  | 1.402 | C9-C10-C11  | 121.3 |
| C16-C21  | 1.382 | C9-C10-C17  | 132.2 |
| C20-S22  | 1.771 | C10-C11-C12 | 120.7 |
| C14-S22  | 1.712 | C11-C10-C17 | 106.4 |
| C19-C23  | 1.406 | C10-C11-C18 | 111.0 |
| C17-S24  | 1.723 | C11-C12-C13 | 118.1 |
| C20-C25  | 1.409 | C12-C11-C18 | 128.3 |
| C26-C27  | 1.397 | C8-C13-C5   | 108.6 |
| C27-C28  | 1.392 | C8-C13-C12  | 121.1 |
| C28-C29  | 1.391 | C5-C13-C12  | 130.3 |
| C29-C30  | 1.392 | C2-C14-C16  | 110.3 |
| C30-C31  | 1.388 | C2-C14-S22  | 135.8 |
| C26-C31  | 1.379 | C1-C15-C16  | 100.7 |
| C25-C32  | 1.372 | C1-C15-C45  | 111.3 |
| C26-C33  | 1.474 | C1-C15-C46  | 111.3 |
| C32-C33  | 1.471 | C14-C16-C15 | 110.8 |
| C33-O34  | 1.213 | C14-C16-C21 | 112.3 |
| C27-C35  | 1.480 | C16-C14-S22 | 113.8 |
| C32-C35  | 1.456 | C15-C16-C21 | 136.9 |
| C35-C36  | 1.374 | C16-C15-C45 | 111.4 |
| C36-C37  | 1.422 | C16-C15-C46 | 111.3 |
| C37-N38  | 1.156 | C10-C17-C19 | 111.0 |
| C36-C39  | 1.422 | C10-C17-S24 | 136.9 |
| C39-N40  | 1.155 | C11-C18-C19 | 100.9 |
| C7-C41   | 1.529 | C11-C18-C43 | 111.3 |
| C7-C42   | 1.528 | C11-C18-C44 | 111.3 |
| C18-C43  | 1.528 | C17-C19-C18 | 110.7 |
| C18-C44  | 1.528 | C17-C19-C23 | 113.4 |
| C15-C45  | 1.528 | C19-C17-S24 | 112.1 |
| C15-C46  | 1.528 | C18-C19-C23 | 135.9 |
| C47-C48  | 1.400 | C19-C18-C43 | 111.3 |
| C48-C49  | 1.398 | C19-C18-C44 | 111.2 |
| C49- C50 | 1.382 | C20-C21-C16 | 113.3 |
| C50-C51  | 1.395 | C21-C20-S22 | 110.6 |
| C47-C52  | 1.379 | C21-C20-C25 | 119.9 |
| C51-C52  | 1.397 | C20-S22-C14 | 90.0  |
| C24-C53  | 1.757 | C22-C20-C25 | 129.5 |

|         |       |             |       |
|---------|-------|-------------|-------|
| C48-C53 | 1.456 | C19-C23-C53 | 112.5 |
| C23-C53 | 1.375 | C17-S24-C53 | 90.8  |
| C51-N54 | 1.409 | C20-C25-C32 | 134.6 |
| N54-C55 | 1.413 | C26-C27-C28 | 119.0 |
| C55-C56 | 1.396 | C27-C26-C31 | 122.8 |
| C55-C57 | 1.395 | C27-C26-C33 | 109.6 |
| C56-C58 | 1.384 | C26-C27-C35 | 108.7 |
| C57-C59 | 1.386 | C27-C28-C29 | 118.4 |
| C58-C60 | 1.389 | C28-C27-C35 | 132.3 |
| C59-C60 | 1.388 | C28-C29-C30 | 121.8 |
| N54-C61 | 1.414 | C29-C30-C31 | 120.1 |
| C61-C62 | 1.418 | C30-C31-C26 | 117.9 |
| C61-C63 | 1.374 | C31-C26-C33 | 127.6 |
| C62-C64 | 1.364 | C25-C32-C33 | 125.2 |
| C63-C65 | 1.412 | C25-C32-C35 | 126.7 |
| C64-C66 | 1.415 | C26-C33-C32 | 106.5 |
| C65-C66 | 1.422 | C26-C33-O34 | 125.9 |
| C66-C67 | 1.412 | C32-C33-O34 | 127.7 |
| C65-C68 | 1.414 | C33-C32-C35 | 108.0 |
| C67-C69 | 1.369 | C27-C35-C32 | 107.2 |
| C68-C70 | 1.368 | C27-C35-C36 | 124.4 |
| C69-C70 | 1.409 | C32-C35-C36 | 128.4 |

Table S11 continued....

| Bond Angles |       |
|-------------|-------|
| C35-C36-C37 | 123.9 |
| C35-C36-C39 | 123.1 |
| C36-C37-C38 | 179.0 |
| C37-C36-C39 | 113.0 |
| C36-C39-N40 | 178.2 |
| C41-C7-C42  | 110.4 |
| C43-C18-C44 | 110.5 |
| C45-C15-C46 | 110.5 |
| C47-C48-C49 | 117.6 |
| C48-C47-C52 | 121.4 |
| C47-C48-C53 | 120.2 |
| C48-C49-C50 | 121.4 |
| C49-C48-C53 | 122.2 |
| C49-C50-C51 | 120.6 |
| C50-C51-C52 | 118.6 |
| C50-C51-N54 | 121.0 |
| C47-C52-C51 | 120.6 |
| C52-C51-N54 | 120.5 |
| C24-C53-C48 | 120.5 |
| C24-C53-C23 | 111.2 |
| C48-C53-C23 | 128.3 |
| C51-N54-C55 | 120.4 |
| C51-N54-C61 | 120.0 |
| N54-C55-C56 | 120.4 |
| N54-C55-C57 | 120.4 |
| C55-N54-C61 | 119.6 |

|             |       |
|-------------|-------|
| C56-C55-C57 | 119.1 |
| C55-C56-C58 | 120.2 |
| C55-C57-C59 | 120.2 |
| C56-C58-C60 | 120.6 |
| C57-C59-C60 | 120.6 |
| C58-C60-C59 | 119.3 |
| N54-C61-C62 | 119.2 |
| N54-C61-C63 | 121.2 |
| C62-C61-C63 | 119.6 |
| C61-C62-C64 | 120.4 |
| C61-C63-C65 | 121.0 |
| C62-C64-C66 | 121.2 |
| C63-C65-C66 | 119.2 |
| C63-C65-C68 | 122.0 |
| C64-C66-C65 | 118.5 |
| C64-C66-C67 | 122.4 |
| C65-C66-C67 | 119.1 |
| C66-C65-C68 | 118.7 |
| C66-C67-C69 | 120.8 |
| C65-C68-C70 | 120.8 |
| C67-C69-C70 | 120.1 |
| C68-C70-C69 | 120.4 |

**Table S12:** Summarized structural parameters of compound **FHD4**, bond length (Å) and bond angles.

| Bond Lengths |       | Bond Angles |       |
|--------------|-------|-------------|-------|
| DFT          |       | DFT         |       |
| C1-C2        | 1.412 | C1-C2-C3    | 121.4 |
| C2-C3        | 1.395 | C2-C1-C6    | 120.7 |
| C3-C4        | 1.379 | C1-C2-C14   | 106.8 |
| C4-C5        | 1.407 | C2-C1-C15   | 111.4 |
| C1-C6        | 1.38  | C2-C3-C4    | 117.6 |
| C5-C6        | 1.395 | C3-C2-C14   | 131.8 |
| C4-C7        | 1.514 | C3-C4-C5    | 121.2 |
| C7-C8        | 1.514 | C3-C4-C7    | 128.1 |
| C8-C9        | 1.383 | C4-C5-C6    | 121.1 |
| C9-C10       | 1.391 | C5-C4-C7    | 110.7 |
| C10-C11      | 1.413 | C4-C5-C13   | 108.4 |
| C11-C12      | 1.377 | C1-C6-C5    | 118   |
| C5-C13       | 1.454 | C6-C1-C15   | 128   |
| C12-C13      | 1.397 | C6-C5-C13   | 130.5 |
| C8-C13       | 1.403 | C4-C7-C8    | 101.5 |
| C2-C14       | 1.44  | C4-C7-C42   | 111.2 |
| C1-C15       | 1.521 | C4-C7-C43   | 111.2 |
| C15-C16      | 1.507 | C7-C8-C9    | 128   |
| C14-C16      | 1.386 | C7-C8-C13   | 110.9 |

|         |       |             |       |
|---------|-------|-------------|-------|
| C10-C17 | 1.444 | C8-C7-C42   | 111.2 |
| C11-C18 | 1.521 | C8-C7-C43   | 111.2 |
| C18-C19 | 1.508 | C8-C9-C10   | 117.7 |
| C17-C19 | 1.37  | C9-C8-C13   | 121.1 |
| C16-C21 | 1.382 | C9-C10-C11  | 121.4 |
| C20-C21 | 1.402 | C9-C10-C17  | 132.2 |
| C20-S22 | 1.771 | C10-C11-C12 | 120.6 |
| C14-S22 | 1.711 | C11-C10-C17 | 106.4 |
| C19-C23 | 1.406 | C10-C11-C18 | 111   |
| C23-C24 | 1.375 | C11-C12-C13 | 118.1 |
| C17-S25 | 1.722 | C12-C11-C18 | 128.3 |
| C24-S25 | 1.756 | C5-C13-C12  | 130.4 |
| C20-C26 | 1.41  | C5-C13-C8   | 108.5 |
| C27-C28 | 1.398 | C12-C13-C8  | 121.1 |
| C28-C29 | 1.392 | C2-C14-C16  | 110.4 |
| C29-C30 | 1.391 | C2-C14-S22  | 135.8 |
| C30-C31 | 1.392 | C1-C15-C16  | 100.6 |
| C27-C32 | 1.38  | C1-C15-C46  | 111.3 |
| C31-C32 | 1.388 | C1-C15-C47  | 111.3 |
| C26-C33 | 1.372 | C15-C16-C14 | 110.8 |
| C33-C34 | 1.472 | C15-C16-C21 | 136.9 |
| C27-C34 | 1.474 | C16-C15-C46 | 111.3 |
| C34-O35 | 1.214 | C16-C15-C47 | 111.4 |
| C33-C36 | 1.456 | C14-C16-C21 | 112.3 |
| C28-C36 | 1.48  | C16-C14-S22 | 113.8 |
| C36-C37 | 1.374 | C10-C17-C19 | 111   |
| C37-C38 | 1.422 | C10-C17-S25 | 136.9 |
| C38-N39 | 1.156 | C11-C18-C19 | 100.9 |
| C37-C40 | 1.422 | C11-C18-C44 | 111.4 |
| C40-N41 | 1.155 | C11-C18-C45 | 111.2 |
| C7-C42  | 1.528 | C18-C19-C17 | 110.7 |
| C7-C43  | 1.529 | C18-C19-C23 | 136   |
| C18-C44 | 1.528 | C19-C18-C44 | 111.3 |
| C18-C45 | 1.528 | C19-C18-C45 | 111.3 |
| C15-C46 | 1.528 | C17-C19-C23 | 113.3 |
| C15-C47 | 1.528 | C19-C17-S25 | 112.1 |
| C48-C49 | 1.388 | C16-C21-C20 | 113.3 |
| C49-C50 | 1.394 | C21-C20-S22 | 110.6 |
| C50-C51 | 1.401 | C21-C20-C26 | 119.9 |
| C51-C52 | 1.385 | C20-S22-C14 | 90    |
| C48-C53 | 1.384 | S22-C20-C26 | 129.5 |
| C52-C53 | 1.388 | C19-C23-C24 | 112.5 |
| C54-C55 | 1.402 | C23-C24-S25 | 111.3 |



|         |       |             |       |
|---------|-------|-------------|-------|
| C55-C56 | 1.391 | C23-C24-C57 | 128.3 |
| C24-C57 | 1.458 | C17-S25-C24 | 90.7  |
| C56-C57 | 1.4   | S25-C24-C57 | 120.4 |
| C57-C58 | 1.394 | C20-C26-C33 | 134.6 |
| C58-C59 | 1.385 | C27-C28-C29 | 119   |
| C54-C59 | 1.385 | C28-C27-C32 | 122.8 |
| C55-N60 | 1.404 | C28-C27-C34 | 109.6 |
| C50-N60 | 1.407 | C27-C28-C36 | 108.8 |
| N60-C61 | 1.444 | C28-C29-C30 | 118.4 |
| C51-S62 | 1.775 | C29-C28-C36 | 132.3 |
| C54-S62 | 1.772 | C29-C30-C31 | 121.8 |

**Table S12 continued....**

| <b>Bond Angles</b> |       |
|--------------------|-------|
| C30-C31-C32        | 120.1 |
| C27-C32-C31        | 117.9 |
| C32-C27-C34        | 127.6 |
| C26-C33-C34        | 125.2 |
| C26-C33-C36        | 126.8 |
| C33-C34-C27        | 106.5 |
| C33-C34-O35        | 127.7 |
| C34-C33-36C        | 108   |
| C27-C34-O35        | 125.8 |
| C33-C36-C28        | 107.2 |
| C33-C36-C37        | 128.4 |
| C28-C36-C37        | 124.4 |
| C36-C37-C38        | 123.8 |
| C36-C37-C40        | 123.2 |
| C37-C38-N39        | 179.1 |
| C38-C37-C40        | 113   |
| C37-C40-N41        | 178.2 |
| C42-C7-C43         | 110.4 |
| C44-C18-C45        | 110.5 |
| C46-C15-C47        | 110.5 |
| C48-C49-C50        | 120.7 |
| C49-C48-C53        | 120.5 |
| C49-C50-C51        | 118.2 |
| C49-C50-N60        | 122   |
| C50-C51-C52        | 120.8 |
| C51-C50-N60        | 119.8 |
| C50-C51-S62        | 119.2 |
| C51-C52-C53        | 120.4 |
| C52-C51-S62        | 119.9 |

|             |       |
|-------------|-------|
| C48-C53-C52 | 119.3 |
| C54-C55-C56 | 118.5 |
| C55-C54-C59 | 120.2 |
| C54-C55-N60 | 119.6 |
| C55-C54-S62 | 119.4 |
| C55-C56-C57 | 121.6 |
| C56-C55-N60 | 121.9 |
| C24-C57-C56 | 119.5 |
| C24-C57-C58 | 121.7 |
| C56-C57-C58 | 118.8 |
| C57-C58-C59 | 120.1 |
| C58-C59-C54 | 120.8 |
| C59-C54-S62 | 120.2 |
| C55-N60-C50 | 119.1 |
| C55-N60-C61 | 118.2 |
| C50-N60-C61 | 118.1 |
| C51-S62-C54 | 97.8  |

**Table S13:** Summarized structural parameters of compound **FHD5**, bond length (Å) and bond angles.

| Bond Lengths |       | Bond Angles |       |
|--------------|-------|-------------|-------|
| DFT          |       | DFT         |       |
| C1-C2        | 1.412 | C1-C2-C3    | 121.4 |
| C2-C3        | 1.395 | C2-C1-C6    | 120.7 |
| C3-C4        | 1.378 | C1-C2-C14   | 106.8 |
| C4-C5        | 1.407 | C2-C1-C15   | 111.4 |
| C1-C6        | 1.38  | C2-C3-C4    | 117.6 |
| C5-C6        | 1.395 | C3-C2-C14   | 131.8 |
| C4-C7        | 1.514 | C3-C4-C5    | 121.2 |
| C7-C8        | 1.514 | C3-C4-C7    | 128.1 |
| C8-C9        | 1.383 | C4-C5-C6    | 121.1 |
| C9-C10       | 1.391 | C5-C4-C7    | 110.7 |
| C10-C11      | 1.414 | C4-C5-C13   | 108.4 |
| C11-C12      | 1.377 | C1-C6-C5    | 118   |
| C5-C13       | 1.454 | C6-C1-C15   | 128   |
| C12-C13      | 1.397 | C6-C5-C13   | 130.5 |
| C8-C13       | 1.403 | C4-C7-C8    | 101.5 |
| C2-C14       | 1.439 | C4-C7-C42   | 111.2 |
| C1-C15       | 1.521 | C4-C7-C43   | 111.1 |
| C15-C16      | 1.507 | C7-C8-C9    | 128   |
| C14-C16      | 1.386 | C7-C8-C13   | 110.9 |
| C10-C17      | 1.444 | C8-C7-C42   | 111.3 |
| C11-C18      | 1.521 | C8-C7-C43   | 111.1 |

|         |       |             |       |
|---------|-------|-------------|-------|
| C18-C19 | 1.508 | C8-C9-C10   | 117.7 |
| C17-C19 | 1.369 | C9-C8-C13   | 121.2 |
| C20-C21 | 1.402 | C9-C10-C11  | 121.3 |
| C16-C21 | 1.382 | C9-C10-C17  | 132.3 |
| C20-S22 | 1.771 | C10-C11-C12 | 120.7 |
| C14-S22 | 1.712 | C11-C10-C17 | 106.4 |
| C19-C23 | 1.406 | C10-C11-C18 | 111   |
| C23-C24 | 1.374 | C11-C12-C13 | 118.1 |
| C17-S25 | 1.723 | C12-C11-C18 | 128.3 |
| C24-S25 | 1.756 | C5-C13-C12  | 130.4 |
| C20-C26 | 1.41  | C5-C13-C8   | 108.6 |
| C27-C28 | 1.398 | C12-C13-C8  | 121.1 |
| C28-C29 | 1.392 | C2-C14-C16  | 110.4 |
| C29-C30 | 1.391 | C2-C14-S22  | 135.8 |
| C30-C31 | 1.392 | C1-C15-C16  | 100.7 |
| C27-C32 | 1.379 | C1-C15-C46  | 111.3 |
| C31-C32 | 1.388 | C1-C15-C47  | 111.3 |
| C26-C33 | 1.372 | C15-C16-C14 | 110.8 |
| C33-C34 | 1.471 | C15-C16-C21 | 136.9 |
| C27-C34 | 1.474 | C6-C15-C46  | 111.3 |
| C34-O35 | 1.214 | C16-C15-C47 | 111.4 |
| C33-C36 | 1.456 | C14-C16-C21 | 112.3 |
| C28-C36 | 1.48  | C16-C14-S22 | 113.8 |
| C36-C37 | 1.374 | C10-C17-C19 | 111   |
| C37-C38 | 1.422 | C10-C17-S25 | 137   |
| C38-N39 | 1.156 | C11-C18-C19 | 100.9 |
| C37-C40 | 1.422 | C11-C18-C44 | 111.3 |
| C40-N41 | 1.155 | C11-C18-C45 | 111.3 |
| C7-C42  | 1.528 | C18-C19-C17 | 110.7 |
| C7-C43  | 1.529 | C18-C19-C23 | 135.9 |
| C18-C44 | 1.528 | C19-C18-C44 | 111.3 |
| C18-C45 | 1.528 | C19-C18-C45 | 111.3 |
| C15-C46 | 1.528 | C17-C19-C23 | 113.4 |
| C15-C47 | 1.528 | C19-C17-S25 | 112.1 |
| C48-C49 | 1.392 | C20-C21-C16 | 113.3 |
| C49-C50 | 1.39  | C21-C20-S22 | 110.6 |
| C50-C51 | 1.4   | C21-C20-C26 | 119.9 |
| C51-C52 | 1.377 | C20-S22-C14 | 90    |
| C48-C53 | 1.382 | S22-C20-C26 | 129.5 |
| C52-C53 | 1.391 | C19-C23-C24 | 112.5 |
| C54-C55 | 1.402 | C23-C24-S25 | 111.3 |
| C55-C56 | 1.387 | C23-C24-C57 | 128.2 |
| C24-C57 | 1.458 | C17-S25-C24 | 90.7  |

|         |       |             |       |
|---------|-------|-------------|-------|
| C56-C57 | 1.403 | S25-C24-C57 | 120.5 |
| C57-C58 | 1.392 | C20-C26-C33 | 134.6 |
| C54-C59 | 1.377 | C27-C28-C29 | 119   |
| C58-C59 | 1.388 | C28-C27-C32 | 122.8 |
| C54-O60 | 1.369 | C28-C27-C34 | 109.6 |
| C51-O60 | 1.373 | C27-C28-C36 | 108.7 |
| C55-N61 | 1.396 | C28-C29-C30 | 118.4 |
| C50-N61 | 1.4   | C29-C28-C36 | 132.3 |
| N61-C62 | 1.439 | C29-C30-C31 | 121.8 |

**Table S13 continued....**

| <b>Bond Angles</b> |       |
|--------------------|-------|
| C30-C31-C32        | 120.1 |
| C27-C32-C31        | 117.9 |
| C32-C27-C34        | 127.6 |
| C26-C33-C34        | 125.2 |
| C26-C33-C36        | 126.8 |
| C33-C34-C27        | 106.5 |
| C33-C34-O35        | 127.7 |
| C34-C33-C36        | 108   |
| C27-C34-O35        | 125.8 |
| C33-C36-C28        | 107.2 |
| C33-C36-C37        | 128.4 |
| C28-C36-C37        | 124.4 |
| C36-C37-C38        | 123.8 |
| C36-C37-C40        | 123.2 |
| C37-C38-N39        | 179.1 |
| C38-C37-C40        | 113   |
| C37-C40-N41        | 178.2 |
| C42-C7-C43         | 110.4 |
| C44-C18-C45        | 110.5 |
| C46-C15-C47        | 110.5 |
| C48-C49-C50        | 120.6 |
| C49-C48-C53        | 120.5 |
| C49-C50-C51        | 118.1 |
| C49-C50-N61        | 123.8 |
| C50-C51-C52        | 121.4 |
| C50-C51-O60        | 120.4 |
| C51-C50-N61        | 118.1 |
| C51-C52-C53        | 119.9 |
| C52-C51-O60        | 118.2 |
| C48-C53-C52        | 119.5 |
| C54-C55-C56        | 118.3 |

|             |       |
|-------------|-------|
| C55-C54-C59 | 120.9 |
| C55-C54-O60 | 120.6 |
| C54-C55-N61 | 117.9 |
| C55-C56-C57 | 121.4 |
| C56-C55-N61 | 123.7 |
| C24-C57-C56 | 119.3 |
| C24-C57-C58 | 121.9 |
| C56-C57-C58 | 118.9 |
| C57-C58-C59 | 120.2 |
| C54-C59-C58 | 120.3 |
| C59-C54-O60 | 118.5 |
| C54-O60-C51 | 116.6 |
| C55-N61-C50 | 117.3 |
| C55-N61-C62 | 120.2 |
| C50-N61-C62 | 120.3 |

**Table S14:** Summarized structural parameters of compound **FHD6**, bond length (Å) and bond angles.

| Bond Lengths |       | Bond Angles |       |
|--------------|-------|-------------|-------|
| DFT          |       | DFT         |       |
| C1-C2        | 1.412 | C1-C2-C3    | 121.4 |
| C2-C3        | 1.395 | C2-C1-C6    | 120.6 |
| C3-C4        | 1.378 | C1-C2-C14   | 106.8 |
| C4-C5        | 1.408 | C2-C1-C15   | 111.3 |
| C5-C6        | 1.395 | C2-C3-C4    | 117.6 |
| C1-C6        | 1.38  | C3-C2-C14   | 131.7 |
| C4-C7        | 1.514 | C3-C4-C5    | 121.2 |
| C7-C8        | 1.514 | C3-C4-C7    | 128.1 |
| C8-C9        | 1.383 | C4-C5-C6    | 121.1 |
| C9-C10       | 1.391 | C5-C4-C7    | 110.7 |
| C10-C11      | 1.414 | C4-C5-C13   | 108.4 |
| C11-C12      | 1.377 | C5-C6-C1    | 118   |
| C12-C13      | 1.397 | C6-C5-C13   | 130.5 |
| C5-C13       | 1.454 | C6-C1-C15   | 128   |
| C8-C13       | 1.403 | C4-C7-C8    | 101.5 |
| C2-C14       | 1.439 | C4-C7-C42   | 111.2 |
| C1-C15       | 1.521 | C4-C7-C43   | 111.2 |
| C15-C16      | 1.508 | C7-C8-C9    | 127.9 |
| C14-C16      | 1.386 | C7-C8-C13   | 110.9 |
| C10-C17      | 1.443 | C8-C7-C42   | 111.2 |
| C11-C18      | 1.521 | C8-C7-C43   | 111.2 |
| C17-C19      | 1.37  | C8-C9-C10   | 117.7 |
| C18-C19      | 1.508 | C9-C8-C13   | 121.2 |

|         |       |             |       |
|---------|-------|-------------|-------|
| C16-C21 | 1.382 | C9-C10-C11  | 121.3 |
| C20-C21 | 1.403 | C9-C10-C17  | 132.3 |
| C14-S22 | 1.712 | C10-C11-C12 | 120.7 |
| C20-S22 | 1.771 | C11-C10-C17 | 106.4 |
| C19-C23 | 1.407 | C10-C11-C18 | 111   |
| C23-C24 | 1.374 | C11-C12-C13 | 118.1 |
| C24-S25 | 1.756 | C12-C11-C18 | 128.3 |
| C17-S25 | 1.723 | C12-C13-C5  | 130.4 |
| C20-C26 | 1.409 | C12-C13-C8  | 121   |
| C27-C28 | 1.397 | C5-C13-C8   | 108.5 |
| C28-C29 | 1.392 | C2-C14-C16  | 110.4 |
| C29-C30 | 1.391 | C2-C14-S22  | 135.8 |
| C30-C31 | 1.392 | C1-C15-C16  | 100.7 |
| C31-C32 | 1.388 | C1-C15-C46  | 111.4 |
| C27-C32 | 1.379 | C1-C15-C47  | 111.3 |
| C26-C33 | 1.372 | C15-C16-C14 | 110.8 |
| C27-C34 | 1.474 | C15-C16-C21 | 136.9 |
| C33-C34 | 1.471 | C16-C15-C46 | 111.4 |
| C34-O35 | 1.214 | C16-C15-C47 | 111.3 |
| C28-C36 | 1.48  | C14-C16-C21 | 112.3 |
| C33-C36 | 1.456 | C16-C14-S22 | 113.8 |
| C36-C37 | 1.374 | C10-C17-C19 | 111   |
| C37-C38 | 1.422 | C10-C17-S25 | 137   |
| C38-N39 | 1.156 | C11-C18-C19 | 100.9 |
| C37-C40 | 1.422 | C11-C18-C44 | 111.2 |
| C40-N41 | 1.156 | C11-C18-C45 | 111.3 |
| C7-C42  | 1.529 | C17-C19-C18 | 110.7 |
| C7-C43  | 1.529 | C17-C19-C23 | 113.4 |
| C18-C44 | 1.528 | C19-C17-S25 | 112.1 |
| C18-C45 | 1.528 | C18-C19-C23 | 135.9 |
| C15-C46 | 1.528 | C19-C18-C44 | 111.3 |
| C15-C47 | 1.528 | C19-C18-C45 | 111.3 |
| C48-C49 | 1.531 | C16-C21-C20 | 113.3 |
| C50-C51 | 1.41  | C21-C20-S22 | 110.6 |
| C51-C52 | 1.398 | C21-C20-C26 | 119.9 |
| C24-C53 | 1.46  | C14-S22-C20 | 90    |
| C52-C53 | 1.398 | S22-C20-C26 | 129.5 |
| C53-C54 | 1.393 | C19-C23-C24 | 112.5 |
| C50-C55 | 1.382 | C23-C24-S25 | 111.3 |
| C54-C55 | 1.387 | C23-C24-C53 | 128.3 |
| C51-N56 | 1.387 | C24-S25-C17 | 90.8  |
| C48-N56 | 1.483 | S25-C24-C53 | 120.4 |
| N56-C57 | 1.441 | C20-C26-C33 | 134.6 |

|         |       |             |       |
|---------|-------|-------------|-------|
| C49-C58 | 1.517 | C27-C28-C29 | 119   |
| C50-C58 | 1.492 | C28-C27-C32 | 122.8 |
| C48-C59 | 1.529 | C28-C27-C34 | 109.6 |
| C48-C60 | 1.527 | C27-C28-C36 | 108.7 |

Table S14 continued....

| Bond Angles |       |
|-------------|-------|
| C28-C29-C30 | 118.4 |
| C29-C28-C36 | 132.3 |
| C29-C30-C31 | 121.8 |
| C30-C31-C32 | 120.1 |
| C31-C32-C27 | 117.9 |
| C32-C27-C34 | 127.6 |
| C26-C33-C34 | 125.2 |
| C26-C33-C36 | 126.9 |
| C27-C34-C33 | 106.5 |
| C27-C34-O35 | 125.7 |
| C33-C34-O35 | 127.7 |
| C34-C33-C36 | 108   |
| C28-C36-C33 | 107.2 |
| C28-C36-C37 | 124.4 |
| C33-C36-C37 | 128.5 |
| C36-C37-C38 | 123.8 |
| C36-C37-C40 | 123.2 |
| C37-C38-N39 | 179   |
| C38-C37-C40 | 113   |
| C37-C40-N41 | 178.2 |
| C42-C7-C43  | 110.4 |
| C44-C18-C45 | 110.5 |
| C46-C15-C47 | 110.5 |
| C49-C48-N56 | 110   |
| C48-C49-C58 | 112.2 |
| C49-C48-C59 | 107.8 |
| C49-C48-C60 | 109.5 |
| C50-C51-C52 | 118.4 |
| C51-C50-C55 | 119.6 |
| C50-C51-N56 | 119.6 |
| C51-C50-C58 | 117.3 |
| C51-C52-C53 | 121.5 |
| C52-C51-N56 | 122   |
| C24-C53-C52 | 119.3 |
| C24-C53-C54 | 121.4 |
| C52-C53-C54 | 119.3 |

|             |       |
|-------------|-------|
| C53-C54-C55 | 119.3 |
| C50-C55-C54 | 121.8 |
| C55-C50-C58 | 123.1 |
| C51-N56-C48 | 122.5 |
| C51-N56-C57 | 118.2 |
| C48-N56-C57 | 117   |
| N56-C48-C59 | 110.3 |
| N56-C48-C60 | 109.5 |
| C49-C58-C50 | 107.9 |
| C59-C48-C60 | 109.8 |

**Table S15:**  $E_{\text{HOMO}}$ ,  $E_{\text{LUMO}}$  and energy gap (LUMO+1, HOMO-1, LUMO+2 and HOMO-2) of investigated compounds in  $eV$ .

| Compounds   | LUMO+1 | HOMO-1 | Band Gap | LUMO+2 | HOMO-2 | Band Gap |
|-------------|--------|--------|----------|--------|--------|----------|
| <b>FH</b>   | -3.143 | -6.564 | 3.421    | -2.631 | -7.345 | 4.714    |
| <b>FHD1</b> | -2.557 | -6.242 | 3.685    | -1.850 | -6.809 | 4.959    |
| <b>FHD2</b> | -2.554 | -5.923 | 3.369    | -1.785 | -6.484 | 4.699    |
| <b>FHD3</b> | -2.554 | -5.900 | 3.346    | -1.789 | -6.454 | 4.665    |
| <b>FHD4</b> | -2.559 | -5.894 | 3.335    | -1.819 | -6.428 | 4.609    |
| <b>FHD5</b> | -2.555 | -5.806 | 3.251    | -1.764 | -6.415 | 4.651    |
| <b>FHD6</b> | -2.549 | -5.800 | 3.251    | -1.719 | -6.354 | 4.635    |

$E$ = energy,  $\Delta E$  ( $eV$ )=  $E_{\text{LUMO}}-E_{\text{HOMO}}$ ; HOMO= highest occupied molecular orbital; LUMO= lowest unoccupied molecular orbital, MO, molecular orbital

**Table S16:** Natural bond orbital (NBO) analysis of investigated compound **FH**

| Donor(i) | Type  | Acceptor(j) | Type    | $E(2)^a$ [kJ/mol] | $E(J)E(i)^b$ (a.u) | $F(L,j)^c$ (a.u) |
|----------|-------|-------------|---------|-------------------|--------------------|------------------|
| C28-C30  | $\pi$ | C32-C53     | $\pi^*$ | 31.51             | 0.31               | 0.089            |
| C14-C15  | $\pi$ | C12-C13     | $\pi^*$ | 27.02             | 0.29               | 0.08             |
| C32-C53  | $\pi$ | C62-C63     | $\pi^*$ | 26.77             | 0.30               | 0.08             |
| C18-C20  | $\pi$ | C24-C25     | $\pi^*$ | 25.12             | 0.29               | 0.078            |
| C32-C53  | $\pi$ | C60-O61     | $\pi^*$ | 23.63             | 0.31               | 0.078            |
| C50-C51  | $\pi$ | C47-C52     | $\pi^*$ | 22.46             | 0.29               | 0.073            |
| C10-C11  | $\pi$ | C14-C15     | $\pi^*$ | 21.21             | 0.30               | 0.073            |
| C12-C13  | $\pi$ | C14-C15     | $\pi^*$ | 20.89             | 0.30               | 0.071            |
| C14-C15  | $\pi$ | C10-C11     | $\pi^*$ | 20.35             | 0.30               | 0.072            |
| C12-C13  | $\pi$ | C10-C11     | $\pi^*$ | 19.24             | 0.30               | 0.070            |
| C47-C52  | $\pi$ | C62-C63     | $\pi^*$ | 18.74             | 0.29               | 0.067            |
| C24-C25  | $\pi$ | C18-C20     | $\pi^*$ | 17.83             | 0.31               | 0.067            |
| C21-C23  | $\pi$ | C12-C13     | $\pi^*$ | 14.60             | 0.32               | 0.062            |
| C32-C53  | $\pi$ | C28-C30     | $\pi^*$ | 11.17             | 0.29               | 0.053            |



|         |          |         |            |       |      |       |
|---------|----------|---------|------------|-------|------|-------|
| C64-C65 | $\pi$    | C37-C38 | $\pi^*$    | 8.80  | 0.33 | 0.050 |
| C64-C65 | $\pi$    | C34-C42 | $\pi^*$    | 7.85  | 0.33 | 0.046 |
| C60-O61 | $\pi$    | C32-C53 | $\pi^*$    | 3.64  | 0.43 | 0.038 |
| C34-C42 | $\pi$    | C34-C42 | $\pi^*$    | 2.70  | 0.31 | 0.026 |
| C64-C65 | $\pi$    | C64-C65 | $\pi^*$    | 1.94  | 0.32 | 0.023 |
| C70-N71 | $\pi$    | C72-N73 | $\pi^*$    | 0.74  | 0.47 | 0.017 |
| C32-H33 | $\sigma$ | C30-S31 | $\sigma^*$ | 10.29 | 0.71 | 0.076 |
| C63-C72 | $\sigma$ | C72-N73 | $\sigma^*$ | 8.15  | 1.61 | 0.103 |
| C66-N67 | $\sigma$ | C65-C66 | $\sigma^*$ | 7.89  | 1.57 | 0.100 |
| C32-H33 | $\sigma$ | C53-C60 | $\sigma^*$ | 6.95  | 0.99 | 0.074 |
| C65-C66 | $\sigma$ | C64-C65 | $\sigma^*$ | 6.14  | 1.34 | 0.081 |
| C36-C41 | $\sigma$ | C36-C37 | $\sigma^*$ | 5.99  | 1.30 | 0.079 |
| C14-C15 | $\sigma$ | C13-C22 | $\sigma^*$ | 4.96  | 1.14 | 0.067 |
| C11-H16 | $\sigma$ | C12-C13 | $\sigma^*$ | 4.69  | 1.08 | 0.064 |
| C63-C70 | $\sigma$ | C47-C62 | $\sigma^*$ | 3.99  | 1.22 | 0.062 |
| C86-H87 | $\sigma$ | C22-C82 | $\sigma^*$ | 3.67  | 0.89 | 0.051 |
| C53-C62 | $\sigma$ | C60-O61 | $\sigma^*$ | 3.02  | 1.28 | 0.056 |
| C40-C41 | $\sigma$ | C39-C40 | $\sigma^*$ | 2.95  | 1.3  | 0.055 |
| C60-O61 | $\sigma$ | C47-C48 | $\sigma^*$ | 0.65  | 1.68 | 0.030 |
| C30-S31 | $\sigma$ | C30-C32 | $\sigma^*$ | 0.51  | 1.21 | 0.022 |
| S31     | LP(2)    | C28-C30 | $\pi^*$    | 22.51 | 0.26 | 0.069 |
| O59     | LP(2)    | C36-C58 | $\sigma^*$ | 20.97 | 0.76 | 0.114 |
| O61     | LP(2)    | C53-C60 | $\sigma^*$ | 19.03 | 0.75 | 0.108 |
| N69     | LP(1)    | C65-C68 | $\sigma^*$ | 12.61 | 1.04 | 0.102 |
| S31     | LP(1)    | C21-C23 | $\sigma^*$ | 3.28  | 1.23 | 0.057 |
| S31     | LP(1)    | C28-C30 | $\sigma^*$ | 2.19  | 1.21 | 0.046 |
| O59     | LP(1)    | C36-C58 | $\sigma^*$ | 1.66  | 1.18 | 0.040 |
| O61     | LP(1)    | C21-S31 | $\sigma^*$ | 1.30  | 0.95 | 0.032 |
| S31     | LP(1)    | C12-C21 | $\sigma^*$ | 1.05  | 1.18 | 0.032 |

**Table S17:** Natural bond orbital (NBO) analysis of investigated compound **FHD1**

| Donor(i) | Type  | Acceptor(j) | Type    | E(2) <sup>a</sup> [kcal/mol] | E(J)E(i) <sup>b</sup> (a.u) | F(I,j) <sup>c</sup> (a.u) |
|----------|-------|-------------|---------|------------------------------|-----------------------------|---------------------------|
| C24-C25  | $\pi$ | C31-C39     | $\pi^*$ | 32.47                        | 0.31                        | 0.09                      |
| C5-C6    | $\pi$ | C1-C2       | $\pi^*$ | 27.78                        | 0.29                        | 0.081                     |
| C18-C20  | $\pi$ | C24-C25     | $\pi^*$ | 25.86                        | 0.28                        | 0.078                     |
| C31-C39  | $\pi$ | C44-O45     | $\pi^*$ | 24.01                        | 0.31                        | 0.078                     |
| C81-C82  | $\pi$ | C77-C78     | $\pi^*$ | 23.56                        | 0.29                        | 0.074                     |
| C79-C80  | $\pi$ | C77-C78     | $\pi^*$ | 22.67                        | 0.30                        | 0.074                     |
| C89-C90  | $\pi$ | C91-C92     | $\pi^*$ | 21.99                        | 0.30                        | 0.072                     |
| C88-C93  | $\pi$ | C81-C82     | $\pi^*$ | 20.94                        | 0.29                        | 0.07                      |
| C5-C6    | $\pi$ | C3-C4       | $\pi^*$ | 19.79                        | 0.30                        | 0.071                     |
| C34-C35  | $\pi$ | C46-C47     | $\pi^*$ | 18.69                        | 0.29                        | 0.066                     |

|         |          |         |            |       |      |       |
|---------|----------|---------|------------|-------|------|-------|
| C24-C25 | $\pi$    | C18-C20 | $\pi^*$    | 17.77 | 0.3  | 0.067 |
| C18-C20 | $\pi$    | C1-C2   | $\pi^*$    | 14.44 | 0.32 | 0.062 |
| C77-C78 | $\pi$    | C28-C98 | $\pi^*$    | 12.97 | 0.28 | 0.055 |
| C31-C39 | $\pi$    | C24-C25 | $\pi^*$    | 11.25 | 0.29 | 0.053 |
| C28-C98 | $\pi$    | C77-C78 | $\pi^*$    | 10.7  | 0.32 | 0.055 |
| C46-C47 | $\pi$    | C34-C35 | $\pi^*$    | 8.77  | 0.33 | 0.05  |
| C46-C47 | $\pi$    | C31-C39 | $\pi^*$    | 7.81  | 0.33 | 0.046 |
| C44-O45 | $\pi$    | C31-C39 | $\pi^*$    | 3.61  | 0.43 | 0.038 |
| C18-C20 | $\pi$    | C18-C20 | $\pi^*$    | 1.15  | 0.3  | 0.017 |
| C50-N51 | $\pi$    | C48-N49 | $\pi^*$    | 0.77  | 0.47 | 0.017 |
| C31-H32 | $\sigma$ | C24-S27 | $\sigma^*$ | 10.41 | 0.71 | 0.077 |
| C47-C50 | $\sigma$ | C50-N51 | $\sigma^*$ | 8.15  | 1.61 | 0.103 |
| C48-N49 | $\sigma$ | C47-C48 | $\sigma^*$ | 7.89  | 1.57 | 0.100 |
| C31-H32 | $\sigma$ | C39-C44 | $\sigma^*$ | 6.88  | 0.99 | 0.074 |
| C46-C47 | $\sigma$ | C47-C50 | $\sigma^*$ | 6.14  | 1.27 | 0.079 |
| C28-H29 | $\sigma$ | S30-C98 | $\sigma^*$ | 5.95  | 0.73 | 0.059 |
| C31-C39 | $\sigma$ | C39-C46 | $\sigma^*$ | 5.35  | 1.24 | 0.073 |
| C10-C11 | $\sigma$ | C11-C12 | $\sigma^*$ | 4.98  | 1.30 | 0.072 |
| C23-C28 | $\sigma$ | C21-C23 | $\sigma^*$ | 4.48  | 1.28 | 0.068 |
| C22-C23 | $\sigma$ | C13-C14 | $\sigma^*$ | 4.21  | 1.24 | 0.065 |
| C22-C23 | $\sigma$ | C21-C23 | $\sigma^*$ | 3.98  | 1.21 | 0.062 |
| C68-H69 | $\sigma$ | C19-C20 | $\sigma^*$ | 3.75  | 0.94 | 0.054 |
| C5-C15  | $\sigma$ | C4-C5   | $\sigma^*$ | 3.38  | 1.23 | 0.058 |
| C80-C86 | $\sigma$ | C80-C81 | $\sigma^*$ | 2.13  | 1.21 | 0.045 |
| C14-H17 | $\sigma$ | C13-C14 | $\sigma^*$ | 1.66  | 1.14 | 0.039 |
| C22-C60 | $\sigma$ | C21-C23 | $\sigma^*$ | 0.93  | 1.20 | 0.030 |
| C12-C13 | $\sigma$ | C22-C64 | $\sigma^*$ | 0.84  | 1.06 | 0.027 |
| C86-H87 | $\sigma$ | C86-C88 | $\sigma^*$ | 0.51  | 0.94 | 0.020 |
| S27     | LP(2)    | C18-C20 | $\pi^*$    | 29.92 | 0.28 | 0.082 |
| S30     | LP(2)    | C21-C23 | $\pi^*$    | 24.58 | 0.29 | 0.076 |
| S27     | LP(2)    | C24-C25 | $\pi^*$    | 22.09 | 0.26 | 0.068 |
| O45     | LP(2)    | C33-C44 | $\sigma^*$ | 20.99 | 0.76 | 0.114 |
| O45     | LP(2)    | C39-C44 | $\sigma^*$ | 18.93 | 0.76 | 0.108 |
| N51     | LP(1)    | C47-C50 | $\sigma^*$ | 12.61 | 1.04 | 0.102 |
| N49     | LP(1)    | C47-C48 | $\sigma^*$ | 12.58 | 1.04 | 0.102 |
| O45     | LP(1)    | C39-C44 | $\sigma^*$ | 3.38  | 1.18 | 0.057 |
| S30     | LP(1)    | C28-C98 | $\sigma^*$ | 2.58  | 1.24 | 0.051 |
| S30     | LP(1)    | C21-C23 | $\sigma^*$ | 2.51  | 1.24 | 0.050 |
| S27     | LP(1)    | C24-C25 | $\sigma^*$ | 2.17  | 1.20 | 0.046 |
| O45     | LP(1)    | C33-C44 | $\sigma^*$ | 1.65  | 1.18 | 0.040 |
| S27     | LP(1)    | C2-C18  | $\sigma^*$ | 1.05  | 1.19 | 0.032 |
| S30     | LP(1)    | C12-C21 | $\sigma^*$ | 0.95  | 1.18 | 0.030 |

**Table S18:** Natural bond orbital (NBO) analysis of investigated compound **FHD2**

| <b>Donor(i)</b> | <b>Type</b> | <b>Acceptor(j)</b> | <b>Type</b> | <b>E(2)<sup>a</sup> [kcal/mol]</b> | <b>E(J)E(i)<sup>b</sup>(a.u)</b> | <b>F(I,j)<sup>c</sup>(a.u)</b> |
|-----------------|-------------|--------------------|-------------|------------------------------------|----------------------------------|--------------------------------|
| C24-C25         | $\pi$       | C31-C39            | $\pi^*$     | 32.52                              | 0.31                             | 0.090                          |
| C31-C39         | $\pi$       | C46-C47            | $\pi^*$     | 27.44                              | 0.30                             | 0.081                          |
| C18-C20         | $\pi$       | C24-C25            | $\pi^*$     | 25.90                              | 0.28                             | 0.078                          |
| C31-C39         | $\pi$       | C44-O45            | $\pi^*$     | 24.03                              | 0.31                             | 0.078                          |
| C2-C3           | $\pi$       | C4-C5              | $\pi^*$     | 23.88                              | 0.31                             | 0.076                          |
| C1-C6           | $\pi$       | C4-C5              | $\pi^*$     | 22.94                              | 0.31                             | 0.076                          |
| C102-C106       | $\pi$       | C99-C100           | $\pi^*$     | 21.84                              | 0.29                             | 0.072                          |
| C13-C14         | $\pi$       | C10-C15            | $\pi^*$     | 20.85                              | 0.31                             | 0.073                          |
| C10-C15         | $\pi$       | C13-C14            | $\pi^*$     | 19.73                              | 0.30                             | 0.071                          |
| C34-C35         | $\pi$       | C46-C47            | $\pi^*$     | 18.68                              | 0.29                             | 0.066                          |
| C24-C25         | $\pi$       | C18-C20            | $\pi^*$     | 17.77                              | 0.30                             | 0.067                          |
| C21-C23         | $\pi$       | C28-C85            | $\pi^*$     | 16.39                              | 0.31                             | 0.065                          |
| C4-C5           | $\pi$       | C10-C15            | $\pi^*$     | 15.96                              | 0.30                             | 0.062                          |
| C28-C85         | $\pi$       | C77-C78            | $\pi^*$     | 11.41                              | 0.32                             | 0.057                          |
| C46-C47         | $\pi$       | C34-C35            | $\pi^*$     | 8.77                               | 0.33                             | 0.050                          |
| C46-C47         | $\pi$       | C31-C39            | $\pi^*$     | 7.81                               | 0.33                             | 0.046                          |
| C44-O45         | $\pi$       | C33-C38            | $\pi^*$     | 4.02                               | 0.44                             | 0.041                          |
| C46-C47         | $\pi$       | C46-C47            | $\pi^*$     | 2.01                               | 0.32                             | 0.023                          |
| C18-C20         | $\pi$       | C18-C20            | $\pi^*$     | 1.15                               | 0.30                             | 0.017                          |
| C50-N51         | $\pi$       | C48-N49            | $\pi^*$     | 0.77                               | 0.47                             | 0.017                          |
| C31-H32         | $\sigma$    | C24-S27            | $\sigma^*$  | 10.42                              | 0.71                             | 0.077                          |
| C47-C50         | $\sigma$    | C50-N51            | $\sigma^*$  | 8.15                               | 1.61                             | 0.103                          |
| C24-C25         | $\sigma$    | C19-C20            | $\sigma^*$  | 7.21                               | 1.16                             | 0.082                          |
| C31-H32         | $\sigma$    | C39-C44            | $\sigma^*$  | 6.88                               | 0.99                             | 0.074                          |
| C28-H29         | $\sigma$    | S30-C85            | $\sigma^*$  | 5.94                               | 0.73                             | 0.059                          |
| C21-C23         | $\sigma$    | C11-C12            | $\sigma^*$  | 5.06                               | 1.30                             | 0.072                          |
| C5-C6           | $\sigma$    | C1-C19             | $\sigma^*$  | 4.96                               | 1.14                             | 0.067                          |
| C18-S27         | $\sigma$    | C24-C31            | $\sigma^*$  | 3.85                               | 1.26                             | 0.062                          |
| C101-C104       | $\sigma$    | C104-C106          | $\sigma^*$  | 3.47                               | 1.30                             | 0.060                          |
| C1-C2           | $\sigma$    | C6-H8              | $\sigma^*$  | 2.89                               | 1.08                             | 0.050                          |
| C77-C85         | $\sigma$    | C78-C79            | $\sigma^*$  | 1.99                               | 1.30                             | 0.046                          |
| C22-C23         | $\sigma$    | C64-H66            | $\sigma^*$  | 1.51                               | 1.01                             | 0.035                          |
| C81-H84         | $\sigma$    | C80-N86            | $\sigma^*$  | 0.93                               | 0.95                             | 0.027                          |
| C38-H43         | $\sigma$    | C37-H42            | $\sigma^*$  | 0.74                               | 0.94                             | 0.024                          |
| S30-C85         | $\sigma$    | C22-C23            | $\sigma^*$  | 0.52                               | 1.11                             | 0.022                          |
| S27             | LP(2)       | C18-C20            | $\pi^*$     | 29.93                              | 0.28                             | 0.082                          |
| S30             | LP(2)       | C21-C23            | $\pi^*$     | 24.42                              | 0.29                             | 0.075                          |
| S27             | LP(2)       | C24-C25            | $\pi^*$     | 22.07                              | 0.26                             | 0.068                          |
| O45             | LP(2)       | C33-C44            | $\sigma^*$  | 20.99                              | 0.76                             | 0.114                          |
| O45             | LP(2)       | C39-C44            | $\sigma^*$  | 18.92                              | 0.76                             | 0.108                          |

|     |       |          |            |       |      |       |
|-----|-------|----------|------------|-------|------|-------|
| N49 | LP(1) | C47-C48  | $\sigma^*$ | 12.58 | 1.04 | 0.102 |
| N86 | LP(1) | C99-C101 | $\sigma^*$ | 3.44  | 0.85 | 0.051 |
| N86 | LP(1) | C80-C81  | $\sigma^*$ | 2.97  | 0.84 | 0.048 |
| S30 | LP(1) | C28-C85  | $\sigma^*$ | 2.58  | 1.24 | 0.051 |
| S27 | LP(1) | C24-C25  | $\sigma^*$ | 2.17  | 1.20 | 0.046 |
| O45 | LP(1) | C33-C44  | $\sigma^*$ | 1.65  | 1.18 | 0.040 |
| S27 | LP(1) | C2-C18   | $\sigma^*$ | 1.05  | 1.19 | 0.032 |
| S30 | LP(1) | C12-C21  | $\sigma^*$ | 0.95  | 1.18 | 0.030 |

**Table S19:** Natural bond orbital (NBO) analysis of investigated compound **FHD3**

| Donor(i)  | Type     | Acceptor(j) | Type       | E(2) <sup>a</sup> [kcal/mol] | E(J)E(i) <sup>b</sup> (a.u) | F(I,j) <sup>c</sup> (a.u) |
|-----------|----------|-------------|------------|------------------------------|-----------------------------|---------------------------|
| C24-C25   | $\pi$    | C31-C39     | $\pi^*$    | 32.54                        | 0.31                        | 0.09                      |
| C31-C39   | $\pi$    | C46-C47     | $\pi^*$    | 27.35                        | 0.30                        | 0.081                     |
| C18-C20   | $\pi$    | C24-C25     | $\pi^*$    | 25.94                        | 0.28                        | 0.079                     |
| C31-C39   | $\pi$    | C44-O45     | $\pi^*$    | 24.08                        | 0.31                        | 0.079                     |
| C2-C3     | $\pi$    | C4-C5       | $\pi^*$    | 23.91                        | 0.31                        | 0.076                     |
| C89-C91   | $\pi$    | C88-C90     | $\pi^*$    | 22.95                        | 0.29                        | 0.075                     |
| C33-C38   | $\pi$    | C34-C35     | $\pi^*$    | 21.95                        | 0.30                        | 0.073                     |
| C13-C14   | $\pi$    | C10-C15     | $\pi^*$    | 20.86                        | 0.31                        | 0.073                     |
| C10-C15   | $\pi$    | C13-C14     | $\pi^*$    | 19.75                        | 0.30                        | 0.071                     |
| C100-C102 | $\pi$    | C99-C101    | $\pi^*$    | 18.94                        | 0.31                        | 0.070                     |
| C104-C106 | $\pi$    | C100-C102   | $\pi^*$    | 17.96                        | 0.29                        | 0.069                     |
| C99-C101  | $\pi$    | C100-C102   | $\pi^*$    | 16.61                        | 0.32                        | 0.066                     |
| C4-C5     | $\pi$    | C10-C15     | $\pi^*$    | 15.94                        | 0.30                        | 0.062                     |
| C77-C78   | $\pi$    | C28-C85     | $\pi^*$    | 14.82                        | 0.29                        | 0.058                     |
| C11-C12   | $\pi$    | C21-C23     | $\pi^*$    | 13.59                        | 0.30                        | 0.057                     |
| C28-C85   | $\pi$    | C77-C78     | $\pi^*$    | 11.67                        | 0.32                        | 0.057                     |
| C46-C47   | $\pi$    | C34-C35     | $\pi^*$    | 8.76                         | 0.33                        | 0.05                      |
| C46-C47   | $\pi$    | C31-C39     | $\pi^*$    | 7.82                         | 0.33                        | 0.046                     |
| C44-O45   | $\pi$    | C33-C38     | $\pi^*$    | 4.02                         | 0.44                        | 0.041                     |
| C44-O45   | $\pi$    | C31-C39     | $\pi^*$    | 0.74                         | 0.43                        | 0.038                     |
| C31-H32   | $\sigma$ | C24-S27     | $\sigma^*$ | 10.44                        | 0.71                        | 0.077                     |
| C47-C50   | $\sigma$ | C50-N51     | $\sigma^*$ | 8.14                         | 1.61                        | 0.103                     |
| C48-N49   | $\sigma$ | C47-C48     | $\sigma^*$ | 7.91                         | 1.57                        | 0.100                     |
| C31-H32   | $\sigma$ | C39-C44     | $\sigma^*$ | 6.84                         | 0.99                        | 0.074                     |
| C28-H29   | $\sigma$ | S30-C85     | $\sigma^*$ | 5.94                         | 0.73                        | 0.059                     |
| C5-C6     | $\sigma$ | C1-C19      | $\sigma^*$ | 4.97                         | 1.14                        | 0.067                     |
| C24-C31   | $\sigma$ | C24-C25     | $\sigma^*$ | 3.99                         | 1.28                        | 0.064                     |
| C47-C48   | $\sigma$ | C47-C50     | $\sigma^*$ | 2.56                         | 1.26                        | 0.051                     |
| C104-C109 | $\sigma$ | C99-C101    | $\sigma^*$ | 2.09                         | 1.30                        | 0.047                     |
| N86-C99   | $\sigma$ | C79-C80     | $\sigma^*$ | 1.95                         | 1.36                        | 0.046                     |
| C9-C10    | $\sigma$ | C9-C56      | $\sigma^*$ | 1.77                         | 1.01                        | 0.038                     |

|           |          |           |            |       |      |       |
|-----------|----------|-----------|------------|-------|------|-------|
| C9-C10    | $\sigma$ | C52-H55   | $\sigma^*$ | 1.49  | 1.01 | 0.035 |
| C111-H112 | $\sigma$ | C108-C111 | $\sigma^*$ | 0.99  | 1.14 | 0.03  |
| C44-O45   | $\sigma$ | C39-C46   | $\sigma^*$ | 0.73  | 1.60 | 0.031 |
| C113-H114 | $\sigma$ | C111-C113 | $\sigma^*$ | 0.50  | 1.08 | 0.021 |
| S27       | LP(2)    | C18-C20   | $\pi^*$    | 29.96 | 0.28 | 0.082 |
| S30       | LP(2)    | C21-C23   | $\pi^*$    | 24.46 | 0.29 | 0.075 |
| S30       | LP(2)    | C28-C85   | $\pi^*$    | 24.21 | 0.28 | 0.074 |
| S27       | LP(2)    | C24-C25   | $\pi^*$    | 22.07 | 0.26 | 0.068 |
| O45       | LP(2)    | C33-C44   | $\sigma^*$ | 20.95 | 0.76 | 0.114 |
| N86       | LP(1)    | C99-C101  | $\pi^*$    | 19.20 | 0.30 | 0.069 |
| O45       | LP(2)    | C39-C44   | $\sigma^*$ | 18.91 | 0.76 | 0.108 |
| N51       | LP(1)    | C47-C50   | $\sigma^*$ | 12.6  | 1.04 | 0.102 |
| N49       | LP(1)    | C47-C48   | $\sigma^*$ | 12.57 | 1.04 | 0.102 |
| N86       | LP(1)    | C99-C100  | $\sigma^*$ | 3.44  | 0.82 | 0.051 |
| N86       | LP(1)    | C88-C90   | $\sigma^*$ | 2.79  | 0.85 | 0.046 |
| S27       | LP(1)    | C24-C25   | $\sigma^*$ | 2.16  | 1.20 | 0.046 |
| O45       | LP(1)    | C33-C44   | $\sigma^*$ | 1.65  | 1.18 | 0.040 |
| S27       | LP(1)    | C2-C18    | $\sigma^*$ | 1.05  | 1.19 | 0.032 |
| S30       | LP(1)    | C12-C21   | $\sigma^*$ | 0.94  | 1.18 | 0.030 |

**Table S20:** Natural bond orbital (NBO) analysis of investigated compound **FHD4**

| Donor(i) | Type     | Acceptor(j) | Type       | E(2) <sup>a</sup> [kcal/mol] | E(J)E(i) <sup>b</sup> (a.u) | F(I,j) <sup>c</sup> (a.u) |
|----------|----------|-------------|------------|------------------------------|-----------------------------|---------------------------|
| C24-C25  | $\pi$    | C32-C40     | $\pi^*$    | 32.42                        | 0.31                        | 0.090                     |
| C5-C6    | $\pi$    | C1-C2       | $\pi^*$    | 27.71                        | 0.29                        | 0.081                     |
| C11-C12  | $\pi$    | C10-C15     | $\pi^*$    | 25.61                        | 0.31                        | 0.08                      |
| C81-C82  | $\pi$    | C77-C78     | $\pi^*$    | 24.25                        | 0.30                        | 0.076                     |
| C84-C85  | $\pi$    | C87-C88     | $\pi^*$    | 22.92                        | 0.31                        | 0.076                     |
| C37-C38  | $\pi$    | C34-C39     | $\pi^*$    | 21.57                        | 0.30                        | 0.073                     |
| C13-C14  | $\pi$    | C10-C15     | $\pi^*$    | 20.95                        | 0.31                        | 0.073                     |
| C5-C6    | $\pi$    | C3-C4       | $\pi^*$    | 19.82                        | 0.30                        | 0.071                     |
| C35-C36  | $\pi$    | C47-C48     | $\pi^*$    | 18.62                        | 0.29                        | 0.066                     |
| C24-C25  | $\pi$    | C18-C20     | $\pi^*$    | 17.73                        | 0.30                        | 0.067                     |
| C21-C23  | $\pi$    | C28-C30     | $\pi^*$    | 16.74                        | 0.31                        | 0.066                     |
| C5-C6    | $\pi$    | C10-C15     | $\pi^*$    | 13.91                        | 0.31                        | 0.058                     |
| C28-C30  | $\pi$    | C87-C88     | $\pi^*$    | 11.75                        | 0.32                        | 0.058                     |
| C47-C48  | $\pi$    | C35-C36     | $\pi^*$    | 8.78                         | 0.33                        | 0.050                     |
| C47-C48  | $\pi$    | C32-C40     | $\pi^*$    | 7.82                         | 0.33                        | 0.046                     |
| C45-O46  | $\pi$    | C34-C39     | $\pi^*$    | 4.03                         | 0.44                        | 0.041                     |
| C32-C40  | $\pi$    | C32-C40     | $\pi^*$    | 2.82                         | 0.31                        | 0.027                     |
| C47-C48  | $\pi$    | C47-C48     | $\pi^*$    | 1.99                         | 0.32                        | 0.023                     |
| C28-C30  | $\pi$    | C87-C88     | $\sigma^*$ | 0.74                         | 0.86                        | 0.023                     |
| C32-H33  | $\sigma$ | C24-S27     | $\sigma^*$ | 10.42                        | 0.71                        | 0.077                     |

|         |          |          |            |       |      |       |
|---------|----------|----------|------------|-------|------|-------|
| C48-C51 | $\sigma$ | C51-N52  | $\sigma^*$ | 8.15  | 1.61 | 0.103 |
| C1-C2   | $\sigma$ | C18-S27  | $\sigma^*$ | 7.31  | 0.91 | 0.073 |
| C32-H33 | $\sigma$ | C40-C45  | $\sigma^*$ | 6.83  | 0.99 | 0.074 |
| C28-H29 | $\sigma$ | C30-S31  | $\sigma^*$ | 5.95  | 0.73 | 0.059 |
| C83-C84 | $\sigma$ | C83-C89  | $\sigma^*$ | 4.94  | 1.31 | 0.072 |
| C23-C28 | $\sigma$ | C21-C23  | $\sigma^*$ | 4.48  | 1.28 | 0.068 |
| C35-C47 | $\sigma$ | C35-C36  | $\sigma^*$ | 3.94  | 1.25 | 0.063 |
| C4-C5   | $\sigma$ | C5-C15   | $\sigma^*$ | 3.26  | 1.20 | 0.056 |
| C34-C35 | $\sigma$ | C36-H41  | $\sigma^*$ | 2.90  | 1.12 | 0.051 |
| C78-C79 | $\sigma$ | C77-H90  | $\sigma^*$ | 1.99  | 1.14 | 0.043 |
| C9-C10  | $\sigma$ | C53-H56  | $\sigma^*$ | 1.49  | 1.01 | 0.035 |
| C88-H94 | $\sigma$ | C87-C88  | $\sigma^*$ | 0.96  | 1.10 | 0.029 |
| C82-H93 | $\sigma$ | C77-H90  | $\sigma^*$ | 0.76  | 0.94 | 0.024 |
| C84-N96 | $\sigma$ | C97-H100 | $\sigma^*$ | 0.50  | 1.17 | 0.022 |
| S27     | LP(1)    | C2-C18   | $\sigma^*$ | 29.96 | 1.19 | 0.032 |
| S27     | LP(1)    | C18-C20  | $\sigma^*$ | 29.1  | 1.23 | 0.057 |
| S27     | LP(1)    | C24-C25  | $\sigma^*$ | 27.95 | 1.20 | 0.046 |
| S27     | LP(2)    | C24-C25  | $\pi^*$    | 24.08 | 0.26 | 0.068 |
| S31     | LP(1)    | C12-C21  | $\sigma^*$ | 22.11 | 1.18 | 0.03  |
| S31     | LP(1)    | C21-C23  | $\sigma^*$ | 20.92 | 1.25 | 0.050 |
| S31     | LP(1)    | C28-C30  | $\sigma^*$ | 18.9  | 1.24 | 0.051 |
| O46     | LP(1)    | C18-S27  | $\sigma^*$ | 12.57 | 0.95 | 0.032 |
| O46     | LP(1)    | C34-C45  | $\sigma^*$ | 11.89 | 1.18 | 0.040 |
| O46     | LP(1)    | C40-C45  | $\sigma^*$ | 8.27  | 1.18 | 0.057 |
| N50     | LP(1)    | C48-C49  | $\sigma^*$ | 3.32  | 1.04 | 0.102 |
| N52     | LP(1)    | C48-C51  | $\sigma^*$ | 2.59  | 1.04 | 0.102 |
| N96     | LP(1)    | C84-C85  | $\pi^*$    | 1.91  | 0.31 | 0.086 |
| S101    | LP(2)    | C83-C84  | $\sigma^*$ | 0.94  | 0.82 | 0.026 |
| S101    | LP(2)    | C83-C89  | $\pi^*$    | 0.89  | 0.29 | 0.057 |

**Table S21:** Natural bond orbital (NBO) analysis of investigated compound **FHD5**

| Donor(i) | Type  | Acceptor(j) | Type    | E(2) <sup>a</sup> [kcal/mol] | E(J)E(i) <sup>b</sup> (a.u) | F(I,j) <sup>c</sup> (a.u) |
|----------|-------|-------------|---------|------------------------------|-----------------------------|---------------------------|
| C24-C25  | $\pi$ | C32-C40     | $\pi^*$ | 32.48                        | 0.31                        | 0.090                     |
| C32-C40  | $\pi$ | C47-C48     | $\pi^*$ | 27.26                        | 0.3                         | 0.081                     |
| C18-C20  | $\pi$ | C24-C25     | $\pi^*$ | 25.92                        | 0.28                        | 0.078                     |
| C32-C40  | $\pi$ | C45-O46     | $\pi^*$ | 24.07                        | 0.31                        | 0.079                     |
| C2-C3    | $\pi$ | C4-C5       | $\pi^*$ | 23.95                        | 0.31                        | 0.076                     |
| C1-C6    | $\pi$ | C4-C5       | $\pi^*$ | 22.92                        | 0.31                        | 0.076                     |
| C37-C38  | $\pi$ | C34-C39     | $\pi^*$ | 21.56                        | 0.3                         | 0.073                     |
| C79-C80  | $\pi$ | C77-C78     | $\pi^*$ | 20.97                        | 0.31                        | 0.072                     |
| C10-C15  | $\pi$ | C13-C14     | $\pi^*$ | 19.76                        | 0.30                        | 0.071                     |
| C87-C88  | $\pi$ | C84-C85     | $\pi^*$ | 18.92                        | 0.29                        | 0.067                     |

|         |          |          |            |       |      |       |
|---------|----------|----------|------------|-------|------|-------|
| C21-C23 | $\pi$    | C28-C30  | $\pi^*$    | 16.45 | 0.31 | 0.065 |
| C11-C12 | $\pi$    | C21-C23  | $\pi^*$    | 13.56 | 0.30 | 0.057 |
| C87-C88 | $\pi$    | C28-C30  | $\pi^*$    | 12.99 | 0.29 | 0.055 |
| C32-C40 | $\pi$    | C24-C25  | $\pi^*$    | 11.24 | 0.29 | 0.053 |
| C47-C48 | $\pi$    | C35-C36  | $\pi^*$    | 8.78  | 0.33 | 0.050 |
| C47-C48 | $\pi$    | C32-C40  | $\pi^*$    | 7.81  | 0.33 | 0.046 |
| C45-O46 | $\pi$    | C32-C40  | $\pi^*$    | 3.59  | 0.43 | 0.038 |
| C32-C40 | $\pi$    | C32-C40  | $\pi^*$    | 2.83  | 0.31 | 0.027 |
| C47-C48 | $\pi$    | C47-C48  | $\pi^*$    | 1.99  | 0.32 | 0.023 |
| C49-N50 | $\pi$    | C51-N52  | $\pi^*$    | 0.73  | 0.47 | 0.017 |
| C32-H33 | $\sigma$ | C24-S27  | $\sigma^*$ | 10.43 | 0.71 | 0.077 |
| C48-C51 | $\sigma$ | C51-N52  | $\sigma^*$ | 8.15  | 1.61 | 0.103 |
| C12-C13 | $\sigma$ | C21-S31  | $\sigma^*$ | 7.64  | 0.89 | 0.074 |
| C32-H33 | $\sigma$ | C40-C45  | $\sigma^*$ | 6.82  | 0.99 | 0.074 |
| C28-C30 | $\sigma$ | C22-C23  | $\sigma^*$ | 6.64  | 1.18 | 0.079 |
| C34-C39 | $\sigma$ | C34-C35  | $\sigma^*$ | 6.02  | 1.30 | 0.079 |
| C83-C89 | $\sigma$ | C83-C84  | $\sigma^*$ | 5.71  | 1.28 | 0.076 |
| C2-C3   | $\sigma$ | C3-C4    | $\sigma^*$ | 4.88  | 1.32 | 0.072 |
| C36-H41 | $\sigma$ | C34-C35  | $\sigma^*$ | 4.47  | 1.10 | 0.063 |
| C22-C23 | $\sigma$ | C21-C23  | $\sigma^*$ | 3.99  | 1.21 | 0.062 |
| C10-C15 | $\sigma$ | C5-C15   | $\sigma^*$ | 3.41  | 1.20 | 0.057 |
| C1-C2   | $\sigma$ | C6-H8    | $\sigma^*$ | 2.89  | 1.08 | 0.050 |
| C19-C73 | $\sigma$ | C19-C20  | $\sigma^*$ | 2.09  | 1.06 | 0.042 |
| C1-C6   | $\sigma$ | C19-C20  | $\sigma^*$ | 0.69  | 1.16 | 0.025 |
| C19-C73 | $\sigma$ | C73-H76  | $\sigma^*$ | 0.60  | 1.01 | 0.022 |
| N97     | LP(1)    | C84-C85  | $\pi^*$    | 36.44 | 0.3  | 0.096 |
| N97     | LP(1)    | C79-C80  | $\pi^*$    | 32.65 | 0.3  | 0.092 |
| S27     | LP(2)    | C18-C20  | $\pi^*$    | 29.98 | 0.28 | 0.082 |
| S31     | LP(2)    | C21-C23  | $\pi^*$    | 24.47 | 0.29 | 0.075 |
| O96     | LP(2)    | C83-C89  | $\pi^*$    | 22.03 | 0.39 | 0.087 |
| O46     | LP(2)    | C34-C45  | $\sigma^*$ | 20.93 | 0.76 | 0.114 |
| O46     | LP(2)    | C40-C45  | $\sigma^*$ | 18.89 | 0.76 | 0.108 |
| N50     | LP(1)    | C48-C49  | $\sigma^*$ | 12.57 | 1.04 | 0.102 |
| N97     | LP(1)    | C98-H100 | $\sigma^*$ | 8.27  | 0.64 | 0.070 |
| S27     | LP(1)    | C18-C20  | $\sigma^*$ | 3.32  | 1.23 | 0.057 |
| O46     | LP(2)    | C18-S27  | $\sigma^*$ | 2.24  | 0.53 | 0.031 |
| N97     | LP(1)    | C98-H99  | $\sigma^*$ | 1.97  | 0.65 | 0.034 |
| O46     | LP(1)    | C34-C45  | $\sigma^*$ | 1.64  | 1.18 | 0.040 |
| S31     | LP(1)    | C12-C21  | $\sigma^*$ | 0.95  | 1.18 | 0.030 |
| O96     | LP(2)    | C80-C81  | $\sigma^*$ | 0.68  | 0.95 | 0.024 |

**Table S22:** Natural bond orbital (NBO) analysis of investigated compound **FHD6**

| Donor(i) | Type  | Acceptor(j) | Type | E(2) <sup>a</sup> [kcal/mol] | E(J)E(i) <sup>b</sup> (a.u) | F(I,j) <sup>c</sup> (a.u) |
|----------|-------|-------------|------|------------------------------|-----------------------------|---------------------------|
| C24-C25  | π     | C32-C40     | π*   | 32.62                        | 0.31                        | 0.09                      |
| C5-C6    | π     | C1-C2       | π*   | 27.82                        | 0.29                        | 0.081                     |
| C18-C20  | π     | C24-C25     | π*   | 26.04                        | 0.28                        | 0.079                     |
| C11-C12  | π     | C10-C15     | π*   | 25.83                        | 0.31                        | 0.08                      |
| C32-C40  | π     | C45-O46     | π*   | 24.13                        | 0.31                        | 0.079                     |
| C83-C84  | π     | C79-C85     | π*   | 23.62                        | 0.31                        | 0.076                     |
| C10-C15  | π     | C5-C6       | π*   | 22.65                        | 0.29                        | 0.073                     |
| C34-C39  | π     | C35-C36     | π*   | 21.93                        | 0.30                        | 0.073                     |
| C13-C14  | π     | C10-C15     | π*   | 20.76                        | 0.31                        | 0.073                     |
| C1-C2    | π     | C3-C4       | π*   | 19.33                        | 0.30                        | 0.070                     |
| C35-C36  | π     | C47-C48     | π*   | 18.61                        | 0.29                        | 0.066                     |
| C24-C25  | π     | C18-C20     | π*   | 17.75                        | 0.30                        | 0.067                     |
| C83-C84  | π     | C80-C81     | π*   | 16.73                        | 0.29                        | 0.064                     |
| C5-C6    | π     | C10-C15     | π*   | 13.84                        | 0.31                        | 0.058                     |
| C32-C40  | π     | C24-C25     | π*   | 11.26                        | 0.29                        | 0.053                     |
| C28-C30  | π     | C83-C84     | π*   | 10.88                        | 0.33                        | 0.056                     |
| C47-C48  | π     | C35-C36     | π*   | 8.78                         | 0.33                        | 0.050                     |
| C45-O46  | π     | C34-C39     | π*   | 4.03                         | 0.44                        | 0.041                     |
| C18-C20  | π     | C18-C20     | π*   | 1.16                         | 0.3                         | 0.017                     |
| C51-N52  | π     | C49-N50     | π*   | 0.76                         | 0.47                        | 0.017                     |
| C32-H33  | σ     | C24-S27     | σ*   | 10.45                        | 0.71                        | 0.077                     |
| C48-C51  | σ     | C51-N52     | σ*   | 8.14                         | 1.61                        | 0.103                     |
| C48-C49  | σ     | C49-N50     | σ*   | 8.09                         | 1.61                        | 0.102                     |
| C12-C13  | σ     | C21-S31     | σ*   | 7.63                         | 0.89                        | 0.074                     |
| C32-H33  | σ     | C40-C45     | σ*   | 6.81                         | 0.99                        | 0.074                     |
| C28-H29  | σ     | C30-S31     | σ*   | 5.98                         | 0.73                        | 0.059                     |
| C21-C23  | σ     | C12-C21     | σ*   | 4.87                         | 1.23                        | 0.069                     |
| C48-C49  | σ     | C35-C47     | σ*   | 3.97                         | 1.22                        | 0.062                     |
| C38-C39  | σ     | C37-C38     | σ*   | 2.97                         | 1.30                        | 0.055                     |
| C5-C6    | σ     | C4-C9       | σ*   | 2.21                         | 1.15                        | 0.045                     |
| C35-C47  | σ     | C40-C47     | σ*   | 1.92                         | 1.16                        | 0.042                     |
| C4-C5    | σ     | C9-C53      | σ*   | 0.91                         | 1.07                        | 0.028                     |
| C2-C18   | σ     | C18-S27     | σ*   | 0.76                         | 0.93                        | 0.024                     |
| C22-C65  | σ     | C65-H68     | σ*   | 0.61                         | 1.01                        | 0.022                     |
| C96-H99  | σ     | C77-N88     | σ*   | 0.51                         | 0.84                        | 0.019                     |
| N88      | LP(1) | C80-C81     | π*   | 41.21                        | 0.29                        | 0.102                     |
| S27      | LP(2) | C18-C20     | π*   | 30.02                        | 0.28                        | 0.082                     |
| S31      | LP(2) | C21-C23     | π*   | 24.47                        | 0.29                        | 0.075                     |
| S27      | LP(2) | C24-C25     | π*   | 22.04                        | 0.26                        | 0.068                     |
| O46      | LP(2) | C34-C45     | σ*   | 20.91                        | 0.76                        | 0.114                     |
| O46      | LP(2) | C40-C45     | σ*   | 18.88                        | 0.76                        | 0.108                     |
| N50      | LP(1) | C48-C49     | σ*   | 12.57                        | 1.04                        | 0.102                     |



|     |       |           |            |      |      |       |
|-----|-------|-----------|------------|------|------|-------|
| N88 | LP(1) | C89-H91   | $\sigma^*$ | 8.86 | 0.63 | 0.071 |
| N88 | LP(1) | C77-C96   | $\sigma^*$ | 5.36 | 0.65 | 0.056 |
| O46 | LP(1) | C40-C45   | $\sigma^*$ | 3.41 | 1.18 | 0.057 |
| S31 | LP(1) | C21-C23   | $\sigma^*$ | 2.51 | 1.24 | 0.050 |
| O46 | LP(1) | C18-S27   | $\sigma^*$ | 1.33 | 0.95 | 0.032 |
| N88 | LP(1) | C80-C81   | $\sigma^*$ | 0.98 | 0.84 | 0.027 |
| N88 | LP(1) | C100-H102 | $\sigma^*$ | 0.66 | 0.65 | 0.02  |
| N88 | LP(1) | C79-C80   | $\sigma^*$ | 0.51 | 0.83 | 0.019 |

$E^{(2)}$  means energy of hyper conjugative interaction (stabilization energy in kcal/mol); Energy difference between donor & acceptor  $i$  &  $j$  NBO orbitals.;  $F(i;j)$  is the Fock matrix element between  $i$  &  $j$  NBO orbitals.

**Table S23:** Wave length, excitation energy and oscillator strength of investigated compound **FH**

| NO | $\lambda$ (nm) | E(eV) | $f$   | MO contributions                                |
|----|----------------|-------|-------|-------------------------------------------------|
| 1  | 650.460        | 1.906 | 3.249 | H→L (92%), H-1→L+1 (6%)                         |
| 2  | 553.205        | 2.241 | 0.031 | H-1→L (12%), H→L+1 (86%),                       |
| 3  | 461.131        | 2.689 | 0.022 | H-1→L (82%), H→L+1 (12%), H-2→L+1 (2%)          |
| 4  | 458.352        | 2.705 | 0.109 | H→L+2 (84%), H-1→L+1 (4%), H-1→L+3 (9%)         |
| 5  | 442.548        | 2.802 | 0.085 | H-1→L+2 (11%), H→L+3 (83%),                     |
| 6  | 420.628        | 2.948 | 0.234 | H-1→L+1 (85%), H-2→L (3%), H→L (7%), H→L+2 (3%) |

MO=molecular orbital, H=HOMO, L=LUMO,  $f$ = oscillator strength

**Table S24:** Wave length, excitation energy and oscillator strength of investigated compound **FHD1**

| $\lambda_{max}(nm)$ | E(eV) | $f_{os}$ | MO transition                                        |
|---------------------|-------|----------|------------------------------------------------------|
| 661.955             | 1.873 | 1.978    | H→L (88%), H-1→L (8%)                                |
| 495.422             | 2.503 | 0.216    | H-1→L (84%), H-2→L (6%), H→L (9%)                    |
| 485.927             | 2.552 | 0.374    | H-1→L+1 (10%), H→L+1 (84%)                           |
| 414.621             | 2.990 | 0.940    | H→L+2 (85%), H-1→L+1 (7%)                            |
| 394.264             | 3.145 | 0.111    | H-1→L+1 (69%), H→L+1 (14%), H-2→L+1 (6%), H→L+2 (6%) |
| 386.943             | 3.204 | 0.052    | H-2→L (85%), H-5→L (3%), H-1→L (7%)                  |

MO=molecular orbital, H=HOMO, L=LUMO,  $f$ = oscillator strength

**Table S25:** Wave length, excitation energy and oscillator strength of investigated compound **FHD2**

| $\lambda_{max}(nm)$ | E(eV) | $f_{os}$ | MO transition |
|---------------------|-------|----------|---------------|
|---------------------|-------|----------|---------------|

|         |       |       |                            |
|---------|-------|-------|----------------------------|
| 683.221 | 1.815 | 1.712 | H-1→L (13%), H→L (83%),    |
| 546.643 | 2.268 | 0.481 | H-1→L (72%), H→L (16%),    |
| 496.831 | 2.496 | 0.297 | H-1→L+1 (13%), H→L+1 (79%) |
| 443.609 | 2.795 | 0.042 | H-2→L (83%), H-1→L (12%),  |
| 427.281 | 2.902 | 0.213 | H-1→L+1 (50%), H→L+2 (26%) |
| 421.056 | 2.945 | 0.875 | H-1→L+1 (17%), H→L+2 (60%) |

MO=molecular orbital, H=HOMO, L=LUMO,  $f$ = oscillator strength

**Table S26:**Wave length, excitation energy and oscillator strength of investigated compound **FHD3**

| $\lambda_{max}(nm)$ | $E(eV)$ | $f_{os}$ | MO transition                |
|---------------------|---------|----------|------------------------------|
| 683.899             | 1.812   | 1.703    | H-1→L (14%), H→L (82%)       |
| 550.674             | 2.251   | 0.490    | H-2→L (10%), H-1→L (72%)     |
| 497.090             | 2.494   | 0.307    | H-1→L+1 (13%), H→L+1 (78%)   |
| 447.920             | 2.768   | 0.050    | H-2→L(80%), H-1→L (13%)      |
| 429.859             | 2.884   | 0.271    | H-2→L+1 (10%), H-1→L+1 (44%) |
| 423.979             | 2.924   | 0.781    | H-1→L+1 (23%), H→L+1 (15%)   |

MO=molecular orbital, H=HOMO, L=LUMO,  $f$ = oscillator strength

**Table S27:**Wave length, excitation energy and oscillator strength of investigated compound **FHD4**

| $\lambda_{max}(nm)$ | $E(eV)$ | $f_{os}$ | MO transition                |
|---------------------|---------|----------|------------------------------|
| 661.602             | 1.874   | 1.862    | H-1→L (16%), H→L (78%)       |
| 536.751             | 2.309   | 0.272    | H-1→L (69%), H→L (21%)       |
| 485.946             | 2.551   | 0.309    | H-1→L+1 (16%), H→L+1 (73%)   |
| 455.172             | 2.723   | 0.077    | H-2→L (81%), H-1→L (14%)     |
| 420.699             | 2.947   | 0.110    | H-2→L+1 (11%), H-1→L+1 (51%) |
| 411.279             | 3.014   | 0.707    | H-1→L+1 (12%), H→L+1 (11%)   |

MO=molecular orbital, H=HOMO, L=LUMO,  $f$ = oscillator strength

**Table S28:**Wave length, excitation energy and oscillator strength of investigated compound **FHD5**

| $\lambda_{max}(nm)$ | $E(eV)$ | $f_{os}$ | MO transition                |
|---------------------|---------|----------|------------------------------|
| 676.068             | 1.833   | 1.600    | H-1→L (20%), H→L (75%)       |
| 569.179             | 2.178   | 0.490    | H-1→L (68%), H→L (24%)       |
| 493.273             | 2.513   | 0.252    | H-1→L+1 (19%), H→L+1 (72%)   |
| 461.268             | 2.687   | 0.102    | H-2→L (85%), H-1→L (11%)     |
| 437.596             | 2.833   | 0.045    | H-2→L+1 (10%), H-1→L+1 (63%) |
| 414.649             | 2.990   | 0.669    | H→L+2 (84%), H-1→L+2 (3%)    |

MO=molecular orbital, H=HOMO, L=LUMO,  $f$ = oscillator strength

**Table S29:**Wave length, excitation energy and oscillator strength of investigated compound **FHD6**

| $\lambda_{max}(nm)$ | $E(eV)$ | $f_{os}$ | MO transition                |
|---------------------|---------|----------|------------------------------|
| 669.244             | 1.852   | 1.816    | H-1→L (13%), H→L (80%)       |
| 544.938             | 2.275   | 0.210    | H-1→L (74%), H→L (18%)       |
| 489.263             | 2.534   | 0.265    | H-1→L+1 (13%), H→L+1 (76%)   |
| 473.584             | 2.618   | 0.155    | H-2→L (83%), H-1→L (12%)     |
| 422.333             | 2.935   | 0.020    | H-2→L+1 (10%), H-1→L+1 (67%) |
| 400.712             | 3.094   | 0.744    | H→L+2 (84%), H-1→L+2 (3%)    |

MO=molecular orbital, H=HOMO, L=LUMO,  $f$ = oscillator strength

**Table S30:** Dipole polarizability and major contributing tensors (Debye) of the studied compounds **D1, D3, D4, D5, D6** and **D7**.

| Dipole Moment                           | <b>R</b>                | <b>D1</b>               | <b>D2</b>               | <b>D3</b>               | <b>D4</b>               | <b>D5</b>               | <b>D6</b>               |
|-----------------------------------------|-------------------------|-------------------------|-------------------------|-------------------------|-------------------------|-------------------------|-------------------------|
| $\mu_x$                                 | 0.0004                  | -10.4100                | -11.3337                | 11.0320                 | 9.2847                  | 10.1613                 | -13.2380                |
| $\mu_y$                                 | 6.5575                  | 3.0371                  | -2.3342                 | -2.4484                 | 0.8777                  | 0.7817                  | -1.4817                 |
| $\mu_z$                                 | 0.0014                  | 0.2302                  | -0.1856                 | 0.3255                  | -0.6963                 | -0.4821                 | 0.3501                  |
| $\mu_{total}$                           | 6.5575                  | 10.8464                 | 11.5731                 | 11.3051                 | 9.3521                  | 10.2027                 | 13.3253                 |
| <b>Polarizability</b>                   |                         |                         |                         |                         |                         |                         |                         |
| $\alpha_{xx}$                           | $4.511 \times 10^{-22}$ | $3.931 \times 10^{-22}$ | $4.069 \times 10^{-22}$ | $4.040 \times 10^{-22}$ | $3.898 \times 10^{-22}$ | $3.877 \times 10^{-22}$ | $3.652 \times 10^{-22}$ |
| $\alpha_{yy}$                           | $1.723 \times 10^{-22}$ | $1.516 \times 10^{-22}$ | $1.697 \times 10^{-22}$ | $1.754 \times 10^{-22}$ | $1.526 \times 10^{-22}$ | $1.500 \times 10^{-22}$ | $1.416 \times 10^{-22}$ |
| $\alpha_{zz}$                           | $5.755 \times 10^{-23}$ | $6.170 \times 10^{-23}$ | $7.456 \times 10^{-23}$ | $7.411 \times 10^{-23}$ | $7.335 \times 10^{-23}$ | $6.773 \times 10^{-23}$ | $5.916 \times 10^{-23}$ |
| $\alpha_{total}$                        | $2.270 \times 10^{-22}$ | $2.021 \times 10^{-22}$ | $2.170 \times 10^{-22}$ | $2.178 \times 10^{-22}$ | $2.053 \times 10^{-22}$ | $2.018 \times 10^{-22}$ | $1.886 \times 10^{-22}$ |
| <b>2<sup>nd</sup> Hyper pol.</b>        |                         |                         |                         |                         |                         |                         |                         |
| $\gamma_x$                              | $3.095 \times 10^{-32}$ | $3.233 \times 10^{-32}$ | $4.259 \times 10^{-32}$ | $4.085 \times 10^{-32}$ | $3.120 \times 10^{-32}$ | $3.448 \times 10^{-32}$ | $2.884 \times 10^{-32}$ |
| $\gamma_y$                              | $1.452 \times 10^{-34}$ | $1.102 \times 10^{-34}$ | $1.467 \times 10^{-34}$ | $1.760 \times 10^{-34}$ | $7.352 \times 10^{-35}$ | $6.825 \times 10^{-35}$ | $7.584 \times 10^{-35}$ |
| $\gamma_z$                              | $6.125 \times 10^{-36}$ | $7.847 \times 10^{-36}$ | $7.996 \times 10^{-36}$ | $7.900 \times 10^{-36}$ | $5.474 \times 10^{-35}$ | $5.649 \times 10^{-35}$ | $9.571 \times 10^{-36}$ |
| <i>Average</i> $\langle \gamma \rangle$ | $3.111 \times 10^{-32}$ | $3.245 \times 10^{-32}$ | $4.275 \times 10^{-32}$ | $4.103 \times 10^{-32}$ | $3.133 \times 10^{-32}$ | $3.460 \times 10^{-32}$ | $2.893 \times 10^{-32}$ |
| <i>Magnitude of</i> $\gamma$            | $3.096 \times 10^{-32}$ | $3.233 \times 10^{-32}$ | $4.259 \times 10^{-32}$ | $4.085 \times 10^{-32}$ | $3.120 \times 10^{-32}$ | $3.448 \times 10^{-32}$ | $2.884 \times 10^{-32}$ |

**Table S31:** The computed first hyperpolarizability ( $\beta_{tot}$ ) and major contributing tensors ( $esu$ ) of entitled compounds.

| Polarizability  | <b>R</b>                 | <b>D1</b>                | <b>D2</b>                | <b>D3</b>                | <b>D4</b>                | <b>D5</b>                | <b>D6</b>                |
|-----------------|--------------------------|--------------------------|--------------------------|--------------------------|--------------------------|--------------------------|--------------------------|
| $\beta_{xxx}$   | $5.841 \times 10^{-32}$  | $-2.641 \times 10^{-27}$ | $-3.188 \times 10^{-27}$ | $3.051 \times 10^{-27}$  | $2.602 \times 10^{-27}$  | $2.797 \times 10^{-27}$  | $-2.615 \times 10^{-27}$ |
| $\beta_{xxy}$   | $-1.852 \times 10^{-28}$ | $-1.286 \times 10^{-28}$ | $9.338 \times 10^{-29}$  | $-4.590 \times 10^{-30}$ | $5.908 \times 10^{-30}$  | $1.368 \times 10^{-29}$  | $-6.488 \times 10^{-29}$ |
| $\beta_{xyy}$   | $-8.261 \times 10^{-34}$ | $2.358 \times 10^{-29}$  | $3.620 \times 10^{-29}$  | $-4.896 \times 10^{-29}$ | $-2.677 \times 10^{-29}$ | $-2.691 \times 10^{-29}$ | $2.343 \times 10^{-29}$  |
| $\beta_{yyy}$   | $1.611 \times 10^{-29}$  | $6.575 \times 10^{-30}$  | $1.288 \times 10^{-30}$  | $-4.203 \times 10^{-30}$ | $2.501 \times 10^{-30}$  | $2.632 \times 10^{-30}$  | $-1.051 \times 10^{-30}$ |
| $\beta_{xxz}$   | $6.396 \times 10^{-32}$  | $-1.276 \times 10^{-29}$ | $-4.660 \times 10^{-30}$ | $-1.518 \times 10^{-31}$ | $1.014 \times 10^{-28}$  | $1.100 \times 10^{-28}$  | $-2.940 \times 10^{-29}$ |
| $\beta_{yyz}$   | $-1.918 \times 10^{-33}$ | $9.455 \times 10^{-32}$  | $-6.408 \times 10^{-31}$ | $-1.194 \times 10^{-30}$ | $-1.780 \times 10^{-30}$ | $-1.926 \times 10^{-30}$ | $1.039 \times 10^{-30}$  |
| $\beta_{xzz}$   | $-5.946 \times 10^{-35}$ | $1.026 \times 10^{-30}$  | $2.210 \times 10^{-30}$  | $-3.013 \times 10^{-30}$ | $-8.959 \times 10^{-31}$ | $3.562 \times 10^{-30}$  | $-1.889 \times 10^{-31}$ |
| $\beta_{vzz}$   | $2.111 \times 10^{-31}$  | $1.450 \times 10^{-31}$  | $-1.199 \times 10^{-31}$ | $1.290 \times 10^{-31}$  | $-5.052 \times 10^{-32}$ | $2.730 \times 10^{-32}$  | $8.169 \times 10^{-31}$  |
| $\beta_{zzz}$   | $-3.321 \times 10^{-34}$ | $-3.454 \times 10^{-31}$ | $-7.702 \times 10^{-33}$ | $-2.314 \times 10^{-31}$ | $1.881 \times 10^{-30}$  | $9.462 \times 10^{-31}$  | $-1.133 \times 10^{-31}$ |
| $\beta_{total}$ | $1.689 \times 10^{-27}$  | $2.620 \times 10^{-27}$  | $3.150 \times 10^{-27}$  | $3.000 \times 10^{-27}$  | $2.576 \times 10^{-27}$  | $2.776 \times 10^{-27}$  | $2.592 \times 10^{-27}$  |

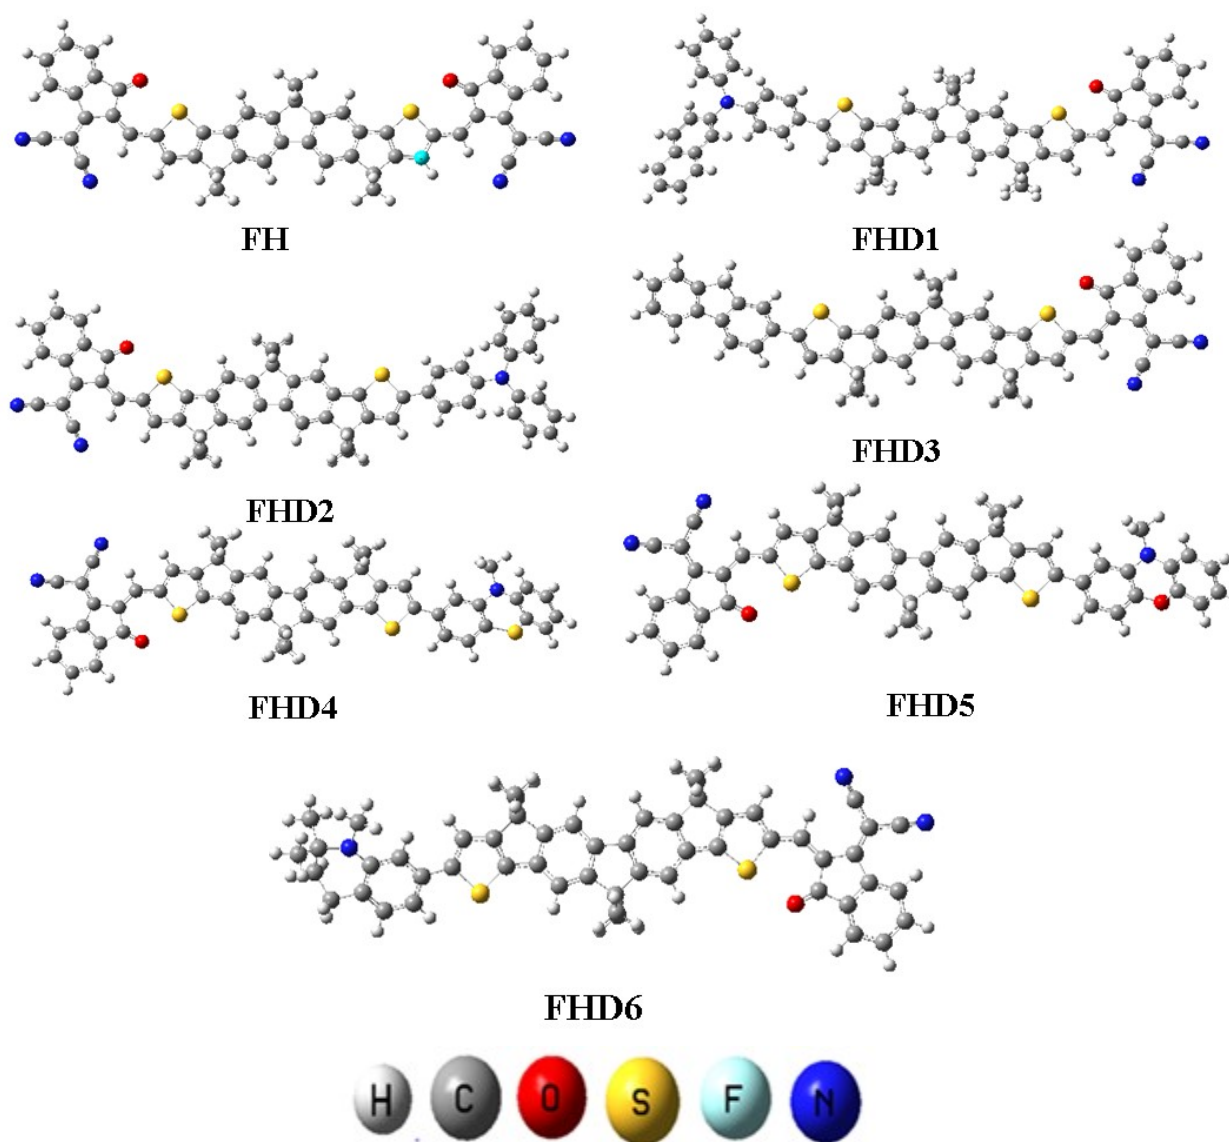

**Figure S1:** The optimized structures of entitled compounds (**FH** and **FHD1-FHD6**)

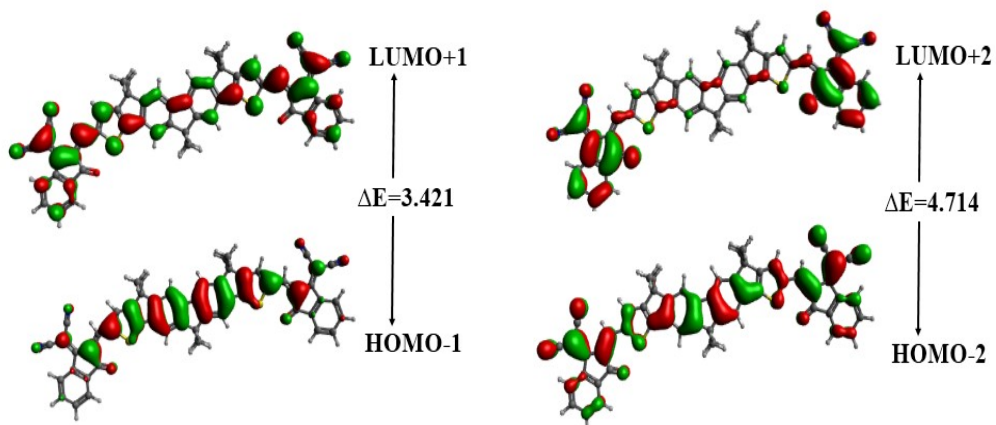

**Figure S2:** Frontier molecular orbitals of **FH**

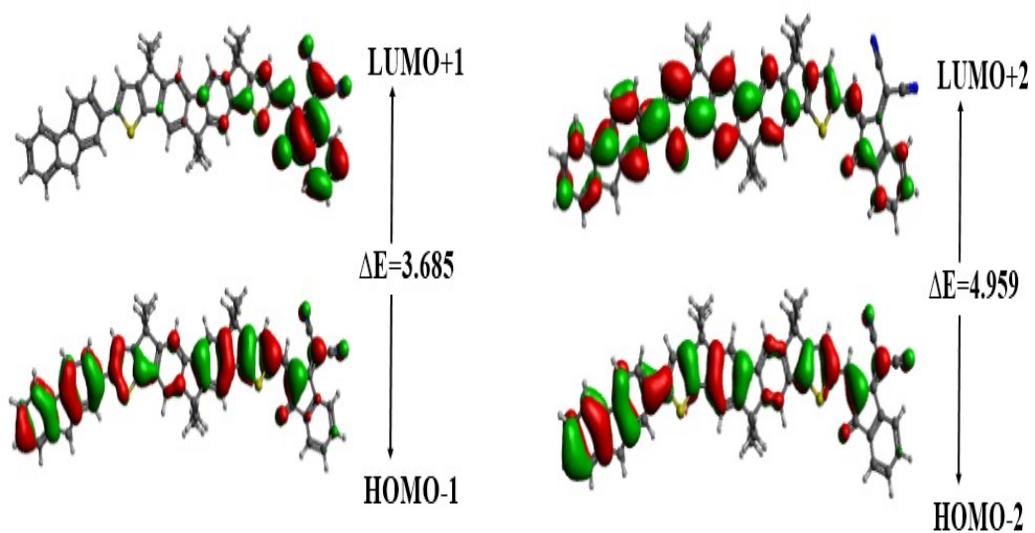

**Figure S3:** Frontier molecular orbitals of **FHD1**

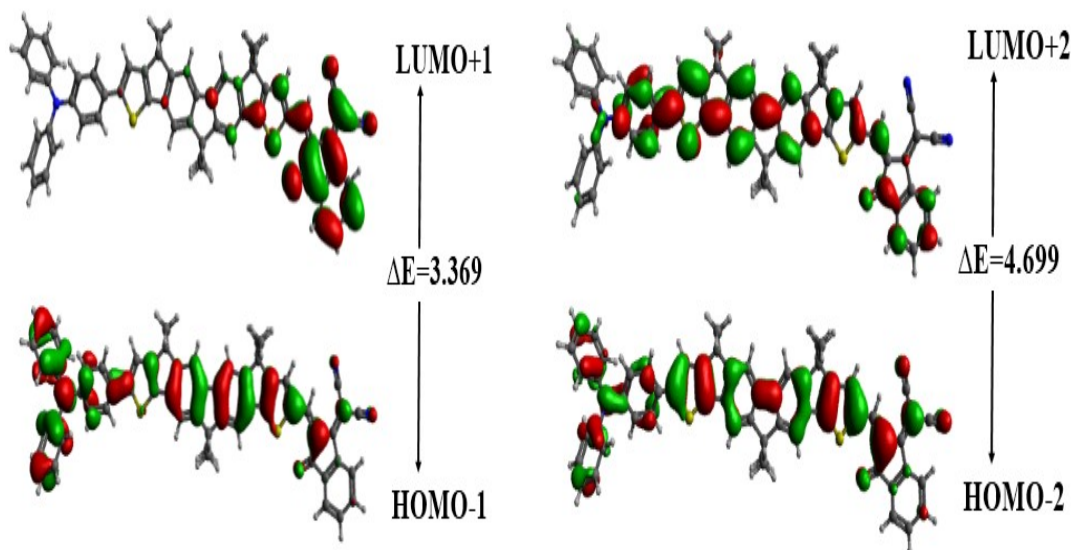

**Figure S3:** Frontier molecular orbitals of **FHD2**

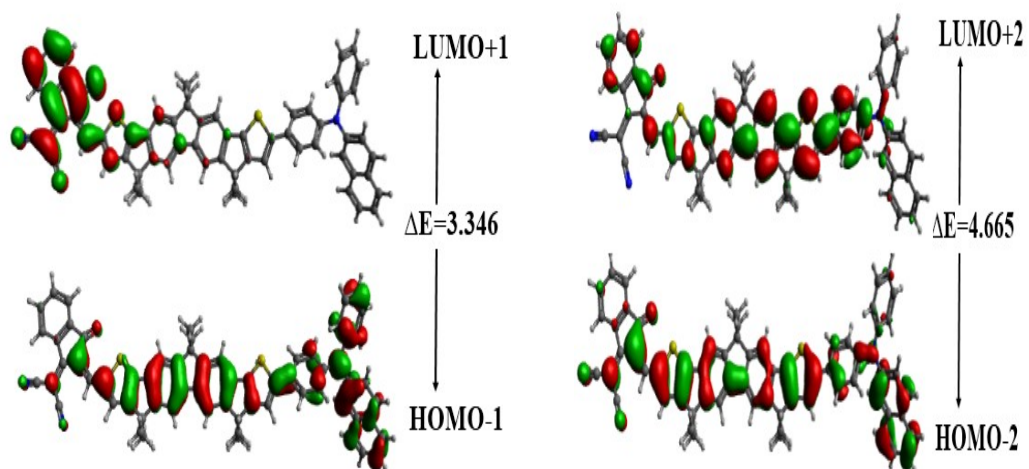

**Figure S4:** Frontier molecular orbitals of **FHD3**

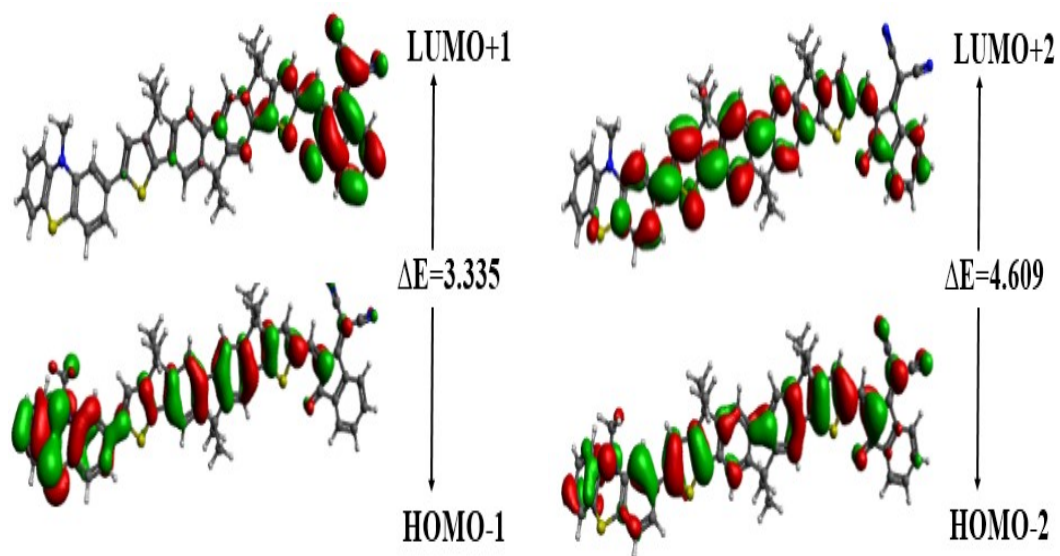

**Figure S5:** Frontier molecular orbitals of **FHD4**

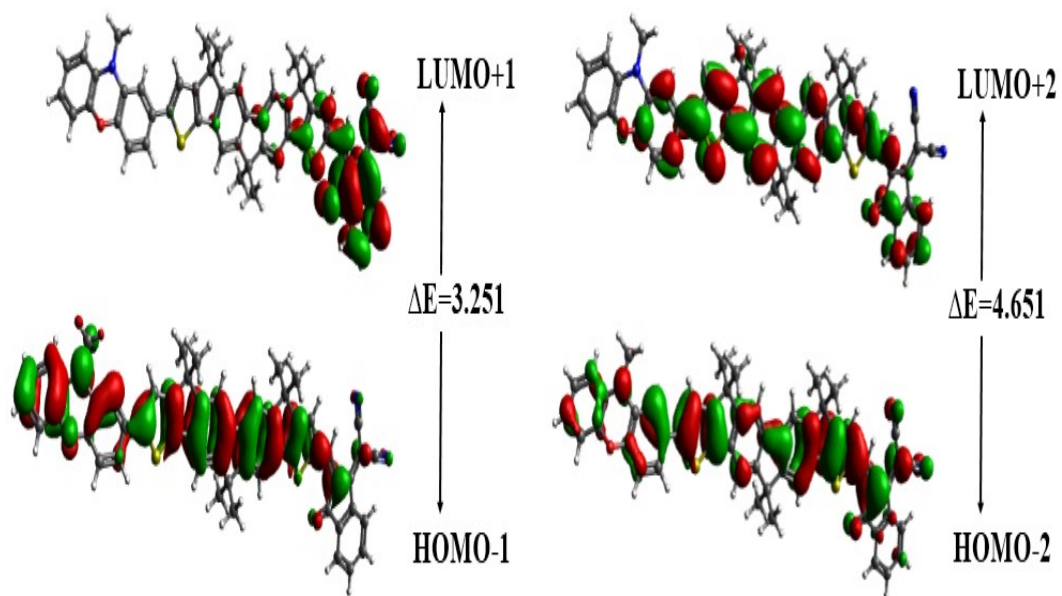

**Figure S6:** Frontier molecular orbitals of **FHD5**



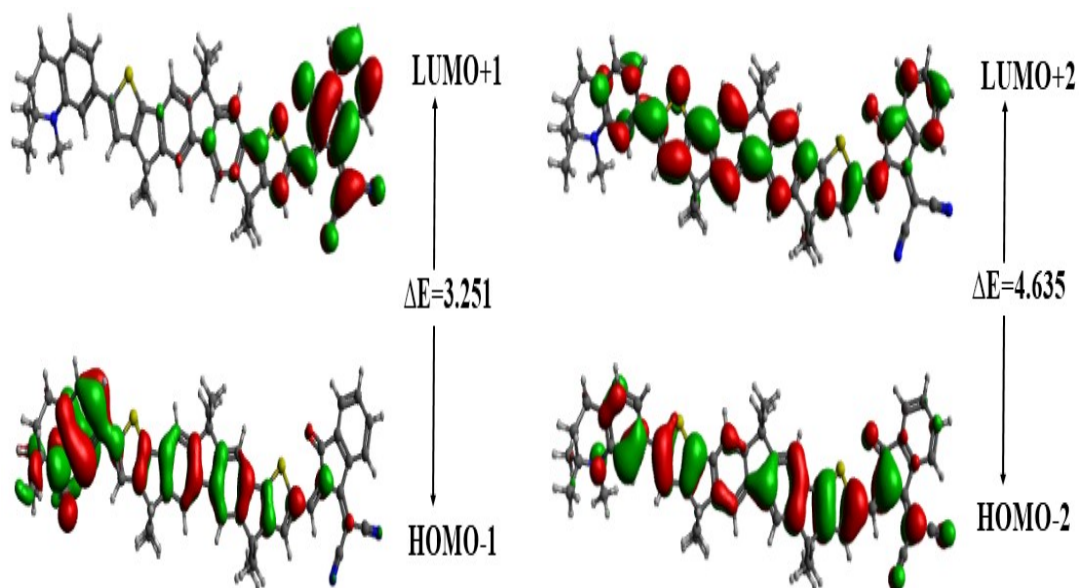

**Figure S7:** Frontier molecular orbitals of **FHD6**

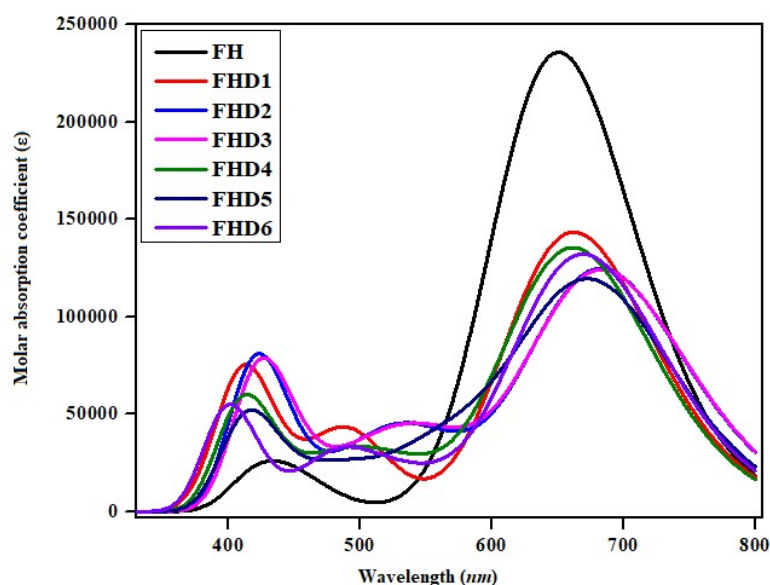

**Figure S8:** Simulated absorption spectra of studied compounds

The designed compounds and their IUPAC names are: (*Z*)-2-(2-((9-(9H-fluoren-2-yl)-4,4,7,7,12,12-hexamethyl-7,12-dihydro-4H-thieno[2'',3'':1',2']indeno[5',6':5,6]-s-indaceno[1,2-b]thien-2-yl)methylene)-3-oxo-2,3-dihydro-1H-inden-1-ylidene)malononitrile (**FHD1**), (*Z*)-2-(2-



((9-(4-(diphenylamino)phenyl)-4,4,7,7,12,12-hexamethyl-7,7a,10a,12-tetrahydro-4H-thieno[2'',3'':1',2']indeno[5',6':5,6]-s-indaceno[1,2-b]thien-2-yl)methylene)-3-oxo-2,3-dihydro-1H-inden-1-ylidene)malononitrile (**FHD2**), (Z)-2-(2-((4,4,7,7,12,12-hexamethyl-9-(1,2,2-trimethyl-1,2,3,4-tetrahydroquinolin-7-yl)-7,7a,10a,12-tetrahydro-4H-thieno[2'',3'':1',2']indeno[5',6':5,6]-s-indaceno[1,2-b]thien-2-yl)methylene)-3-oxo-2,3-dihydro-1H-inden-1-ylidene)malononitrile (**FHD3**), (Z)-2-(2-((4,4,7,7,12,12-hexamethyl-9-(10-methyl-10H-phenothiazin-2-yl)-7,7a,10a,12-tetrahydro-4H-thieno[2'',3'':1',2']indeno[5',6':5,6]-s-indaceno[1,2-b]thien-2-yl)methylene)-3-oxo-2,3-dihydro-1H-inden-1-ylidene)malononitrile (**FHD4**), (Z)-2-(2-((4,4,7,7,12,12-hexamethyl-9-(10-methyl-10H-phenoxazin-2-yl)-7,7a,10a,12-tetrahydro-4H-thieno[2'',3'':1',2']indeno[5',6':5,6]-s-indaceno[1,2-b]thien-2-yl)methylene)-3-oxo-2,3-dihydro-1H-inden-1-ylidene)malononitrile (**FHD5**) and (Z)-2-(2-((4,4,7,7,12,12-hexamethyl-9-(4-(naphthalen-2-yl(phenyl)amino)phenyl)-7,7a,10a,12-tetrahydro-4H-thieno[2'',3'':1',2']indeno[5',6':5,6]-s-indaceno[1,2-b]thien-2-yl)methylene)-3-oxo-2,3-dihydro-1H-inden-1-ylidene)malononitrile (**FHD6**).

$$IP = -E_{HOMO} \quad (S1)$$

$$EA = -E_{LUMO} \quad (S2)$$

$$X = \frac{[IP + EA]}{2} = -\frac{[E_{LUMO} + E_{HOMO}]}{2} \quad (S3)$$

$$\eta = \frac{[IP - EA]}{2} = -\frac{[E_{LUMO} - E_{HOMO}]}{2} \quad (S4)$$

$$\mu = \frac{E_{HOMO} + E_{LUMO}}{2} \quad (S5)$$

$$\sigma = \frac{1}{2\eta} \quad (S6)$$

$$\omega = \frac{\mu^2}{2\eta} \quad (S7)$$
